1  
2  
3  
4  
5  
6  
7  
8  
9  
10  
11  
12  
13  
14  
15  
16  
17  
18  
19  
20  
21  
22  
23  
24  
25  
26

Transcription activation domains of the yeast factors Met4 and Ino2: tandem activation domains with properties similar to the yeast Gcn4 activator.

Derek Pacheco\*<sup>1</sup>, Linda Warfield\*<sup>1</sup>, Michelle Brajcich<sup>1,2</sup>, Hannah Robbins<sup>1,2</sup>, Jie Luo<sup>3</sup>, Jeff Ranish<sup>3</sup>, and Steven Hahn<sup>1</sup>

<sup>1</sup>Fred Hutchinson Cancer Research Center, Seattle WA 98109

<sup>2</sup>University of Washington, School of Medicine, Seattle, WA 98195

<sup>3</sup>The institute for Systems Biology, Seattle WA 98109

\* Equal contributions

Correspondence to:

Steven Hahn

Fred Hutchinson Cancer Research Center

PO Box 19024

1100 Fairview Ave N

Seattle, WA 98109

Email: [shahn@fredhutch.org](mailto:shahn@fredhutch.org)

Phone: 206 667 5261

## 27 **Abstract**

28 Eukaryotic transcription activation domains (ADs) are intrinsically disordered polypeptides that  
29 typically interact with coactivator complexes, leading to stimulation of transcription initiation,  
30 elongation and chromatin modifications. Here we examine the properties of two strong and  
31 conserved yeast ADs: Met4 and Ino2. Both factors have tandem ADs that were identified by  
32 conserved sequence and functional studies. While AD function from both factors depends on  
33 hydrophobic residues, Ino2 further requires key conserved acidic and polar residues for optimal  
34 function. Binding studies show that the ADs bind multiple Med15 activator binding domains  
35 (ABDs) with a similar order of micromolar affinity, and similar but distinct thermodynamic  
36 properties. Protein crosslinking shows that no unique complex is formed upon Met4-Med15  
37 binding. Rather, we observed heterogeneous AD-ABD contacts with nearly every possible AD-  
38 ABD combination. Many of these properties are similar to those observed with the yeast  
39 activator Gcn4, which forms a large heterogeneous, dynamic, and fuzzy complex with Med15.  
40 We suggest that this molecular behavior is common among eukaryotic activators.

41

## 42 **Introduction**

43 Transcription activators play essential roles in gene regulation and regulation of activator  
44 function is often the endpoint of many signaling pathways, serving to modulate transcription in  
45 response to developmental pathways, growth, stress, and other environmental signals (1, 2).  
46 The targeting of multiple activators in different combinations to gene regulatory regions leads  
47 to diverse patterns of gene regulation. Activators can enhance RNA Polymerase II transcription  
48 through binding to coactivator complexes such as Mediator, SAGA, TFIID, Swi/Snf and NuA4,  
49 complexes that contact the basal transcription machinery and/or function to modify chromatin  
50 (3, 4). Most eukaryotic activators contain separate DNA binding and transcription activation  
51 domains (ADs) (3, 5). Unlike DNA binding domains, which are usually structurally ordered,  
52 eukaryotic ADs are intrinsically disordered, lacking a stable structure (6-10).

53

54 Many types of intrinsically disordered proteins bind their targets via short linear motifs, 3-10  
55 residue sequences that function as recognition sites for enzymes such as kinases, acetylases or

56 methylases or as substrates for peptide binding domains such as SH2, SH3 and 14-3-3 domains  
57 (11-14). In contrast, different ADs have little primary sequence similarity, although they are  
58 often enriched for acidic, proline and glutamine residues (15, 16). At least part of this sequence  
59 bias is due to overrepresentation of these residues in intrinsically disordered proteins (17).  
60 Known ADs vary in length from a ~5 residue sequence motif to nearly 100 residues (18-20).  
61 Mutations created within ADs have shown that their function can be remarkably resistant to  
62 mutagenesis, although hydrophobic and sometimes acidic residues are critical for activity (3,  
63 21).

64  
65 One of the best characterized activators is yeast Gcn4, a transcription factor that activates a  
66 large set of genes in response to metabolic stress (22), (23). Gcn4 contains tandem acidic ADs of  
67 unrelated sequence and interacts with the coactivators Mediator, SAGA, NuA4, TFIID, and  
68 Swi/Snf (6, 18, 19, 24-30). Binding of Gcn4 to the Mediator tail module subunit Med15 occurs  
69 via multiple heterogeneous interactions between the tandem ADs and up to 4 activator-binding  
70 domains (ABDs) on Med15 termed KIX, ABD1, ABD2 and ABD3 (27, 28). The measured  
71 individual binding interactions are dynamic with half-lives on the low millisecond timescale (6).  
72 Combined biochemical and structural analysis showed that the interaction between Gcn4 ADs  
73 and Med15 is “fuzzy” as Gcn4 binds to the Med15 activator-binding domains in multiple  
74 orientations (6, 18) and the fuzzy nature of this complex is conserved upon interaction of the  
75 tandem ADs with full length Med15. This binding mechanism can explain how many activators  
76 bind multiple unrelated targets using a variety of AD sequences. In contrast, several well-  
77 characterized activators are known from structural studies to bind their targets using a different  
78 mechanism that utilizes a higher affinity and more specific protein-protein interface (7, 8, 31,  
79 32).

80  
81 To explore whether other activators have properties similar to Gcn4, we used molecular,  
82 genetic, and biochemical approaches to characterize two strong yeast activators, Met4 and  
83 Ino2. Both factors have tandem acidic ADs that are moderately conserved in closely related  
84 yeasts but have primary sequences that are unrelated to each other and to Gcn4. Despite these

85 sequence differences, Met4, Ino2, and Gcn4 have similar function in transcription activation  
86 assays, require Med15 for activation of Mediator Tail dependent promoters, and both ADs bind  
87 Med15 activator-binding domains with low micromolar affinities. These and other results  
88 suggest that Gcn4, Met4 and Ino2 use a similar strategy to bind Mediator that involves a large,  
89 dynamic and fuzzy protein interface.

90

## 91 **Methods**

### 92 **Strains and Plasmids**

93 All yeast strains and primary plasmids used in this work are listed in **Table S1**.

94

### 95 **Cell growth assays and measurement of steady state mRNA levels**

96 Yeast strains were grown in duplicate to an OD<sub>600</sub> of 0.5–0.8 in 2% (wt/vol) dextrose synthetic  
97 complete Ile-Val-Leu medium at 30 °C. Cells were induced with 0.5 µg/mL SM for 90 min to  
98 induce amino acid starvation (27), RNA was extracted and assayed in triplicate by RT-  
99 quantitative PCR, and the results were analyzed as described (27).

100

### 101 **Quantitation of in Vivo AD-Gcn4 Levels**

102 Cells (1.5 mL) from the cultures used for the above mRNA analysis were pelleted and incubated  
103 in 0.1M NaOH for 5 minutes at room temp. Cells were then pelleted and resuspended in 1×  
104 lithium dodecyl sulfate sample buffer (Life Technologies) containing 50 mM DTT and treated  
105 and analyzed as previously described (18).

106

### 107 **Protein purification.**

108 All proteins were expressed in BL21 (DE3) RIL *E. coli*. Med15 constructs were expressed and  
109 purified as described in Tuttle et al. (20). Ino2 1-41-(GS)<sub>3</sub>-96-160 ((GS)<sub>3</sub> is the linker: GSGSGS)  
110 and Met4 72-160 constructs were expressed as N-terminal His6-SUMO-tagged proteins  
111 (Invitrogen). Cells were lysed in 50 mM HEPES pH 7.0, 500 mM NaCl, 40 mM Imidazole, 10%  
112 glycerol, 1 mM PMSF, 5 mM DTT and purified using Ni-Sepharose High Performance resin (GE  
113 Healthcare). Proteins were eluted in 50 mM HEPES pH 7.0, 500 mM NaCl, 500 mM Imidazole,

114 10% glycerol, 1 mM PMSF, 1 mM DTT. Purified SUMO-tagged proteins were concentrated using  
115 10K MWCO centrifugal filters (Millipore), diluted 10x in 50 mM HEPES pH 7.0, 500 mM NaCl, 40  
116 mM Imidazole, 10% glycerol, 1 mM PMSF, 5 mM DTT, and digested with SUMO protease for 3-5  
117 hrs at room temperature using ~1:800 protease:protein ratio. Cleaved His6-Sumo tag was  
118 removed using Ni-Sepharose. Peptides were further purified by chromatography on Source 15Q  
119 (GE Healthcare) using a 50-350 mM NaCl gradient. To remove residual SUMO tag in the sample  
120 due to co-elution on Source 15Q, Ino2 peptides were purified over SUMO-1(CR) resin  
121 (Nectagen) and collected in the flow through. All proteins were further purified using size  
122 exclusion chromatography on Superdex 75 10/30 (GE Healthcare). Proteins used in fluorescence  
123 polarization and isothermal titration calorimetry were eluted in 20 mM KH<sub>2</sub>PO<sub>4</sub>, pH 7.5, 200  
124 mM KCl. Proteins used in crosslinking-Mass spectrometry (CL-MS) were eluted in PBS pH7.2.  
125 The concentration of the purified proteins was determined by UV/Vis spectroscopy with  
126 extinction coefficients calculated with ProtParam {Gasteiger:2005hs}.

127

### 128 **FP and ITC binding experiments**

129 Ino2 1-41-(GS)<sub>3</sub>-96-160 and Met4 72-160 used in fluorescence polarization were labeled with  
130 Oregon Green 488 dye (Invitrogen) as described in (27). FP measurements were conducted  
131 using a Beacon 2000 instrument as described in (27), with concentrations of Med15 spanning 0-  
132 200 μM (ABD3) or 0-125 μM (ABD123, KIX + ABD123). FP data was analyzed using Prism 7  
133 (Graphpad Software, Inc.) to perform non-linear regression analysis using the one-site total  
134 binding model  $Y = B_{max} * X / (K_d + X) + NS * X + Background$  where Y equals arbitrary polarization  
135 units and X equals Med15 concentration.

136

137 ITC titrations were performed using a Microcal ITC200 Microcalorimeter in 20 mM KH<sub>2</sub>PO<sub>4</sub>, pH  
138 7.5, 200 mM KCl as described in (6). The following protein concentrations were used: Med15 6-  
139 90 (79.7 μM) vs. Ino2 1-41-(GS)<sub>3</sub>-96-160 (1.32 mM); Med15 6-90 (79.7 μM) vs. Met4 72-160  
140 (1.27 mM); Med15 158-238 (111 μM) vs. Ino2 1-41-(GS)<sub>3</sub>-96-160 (2.59 mM); Med15 158-238  
141 (117 μM) vs. Met4 72-160 (1.27 mM); Med15 277-368 (113 μM) vs. Ino2 1-41-(GS)<sub>3</sub>-96-160  
142 (1.32 mM); Med15 277-368 (59.7 μM) vs Met4 72-160 (732 μM); Med15 484-651 (111 μM) vs.

143 Ino2 1-41-(GS)<sub>3</sub>-96-160 (1.32 mM); Med15 484-651 (119 μM) vs Met4 72-160 (1.12 mM). The  
144 following parameters were the same for all runs: cell temperature 22°C, reference power 11  
145 μcal/sec, initial delay 120 sec, stir speed 1000 rpm, injection spacing 180 sec, filter period 5 sec,  
146 and injection rate 0.5 μl/sec. Activator was added over 16 injections (injection 1 = 0.4 μl,  
147 injections 2-16 – 2.55 μl). Calorimetric data were plotted and fit with a single binding site model  
148 using Origin 7.0 software (Microcal).

149  
150

### 151 **EDC crosslinking and MS sample preparation**

152 50 μg of Med15 1-651 Δ239-272, Δ373-483 (KIX + ABD123) was mixed with 3x molar excess of  
153 Ino2 1-41-(GS)<sub>3</sub>-96-160 or Met4 72-160. Samples were incubated with 15 mM (Met4) or 10 mM  
154 (Ino2) EDC and 2 mM Sulfo-NHS (Thermo Scientific) in 50 μl total volume PBS pH7.2 (Met4) or  
155 150 μl total volume PBS pH 6.5 for 2 hours at room temperature. Proteins were processed for  
156 MS analysis similarly to described in Tuttle et al (20). Protein samples were reduced with 50  
157 mM TCEP and denatured with 8 M urea at 37°C for 15 min. The samples were then alkylated in  
158 the dark at 37°C with 15 mM iodoacetamide for 1 hour. The samples were then diluted 10-fold  
159 with 100 mM ammonium bicarbonate and digested with Glu-C (20:1 w/w) over night at 37°C.  
160 Samples were then digested with trypsin (1:15 w/w) overnight at 37°C. Digested samples were  
161 purified by C18 chromatography (Waters), eluted in 80% acetonitrile 0.15 trifluoroacetic acid,  
162 and dried in a speedvac.

163  
164

### 165 **MS and data analysis**

166 EDC-cross-linked peptides were analyzed on a Thermo Scientific Orbitrap Elite at the  
167 Proteomics facility at the Fred Hutchinson Cancer Research Center and data were analyzed as  
168 described in (33). Spectra were manually evaluated using the COMET/Lorikeet Spectrum Viewer  
169 (Trans-Proteomic Pipeline) as described in (33).

170  
171

## 171 **Results**

172

### 173 **Mediator tail-dependence of transcription activators**

174 As a first step in exploring the mechanism of yeast ADs in comparison to Gcn4, we tested the  
175 activity and coactivator dependence of several previously characterized transcription factors.  
176 Segments from 7 transcription factors with published AD function were fused to the N-terminus  
177 of the Gcn4 central region linker + Gcn4 DNA binding domain (Gcn4 residues 124-281) and  
178 tested for activation of two Gcn4-dependent promoters: *ARG3* and *HIS4* (both TATA-containing  
179 – defined as TATAWAW (34)). The expression of these AD-Gcn4 derivatives was from low copy  
180 ARS, CEN-containing plasmids under control of the Gcn4 regulatory region with ~1 kb DNA  
181 upstream from the Gcn4 ORF containing all known Gcn4 transcription and translational  
182 regulatory regions. The regions of these factors tested for function were: Met4 residues 1-160  
183 (35); Ino2 residues 1-160 (36); Pdr1 residues 901-1068 (37); Hap4 residues 321-490 (38); Gal4  
184 residues 840-881 (39, 40); Rtg3 residues 1-250 and 375-486 (41). Fusion proteins contained a C-  
185 terminal triple Flag epitope tag to monitor protein expression (18). Gcn4 synthesis and activity  
186 is induced in response to amino acid starvation, so activity of these chimeric activators was  
187 measured 90 min after addition of sulfometuronmethyl (SM), an inhibitor of Ile and Val  
188 biosynthesis, to the cell growth media (27).

189

190 **Figure 1** shows that, when fused to the Gcn4 DBD, all these ADs function to activate  
191 transcription at *ARG3* and *HIS4*, although their relative activity depends on the specific  
192 promoter. Met4, Ino2, Pdr1 and Hap4 are strong ADs at both promoters, comparable or better  
193 than wild type Gcn4. The two Rtg3 ADs have different relative activity, depending on the  
194 promoter, with the C-terminal AD having the most activity at *HIS4*. Western analysis showed  
195 that all proteins were expressed and that the level of expression did not correlate with AD  
196 function (**Fig 2A**).

197

198 TATA-containing Gcn4-activated genes can vary somewhat in their dependence on the  
199 Mediator tail module, a direct binding target for Gcn4. For example, *ARG3* shows 5-10-fold  
200 dependence on Med15, a Mediator Tail subunit, while *HIS4* shows ~2-fold dependence (27). We

201 measured Mediator tail dependence of these chimeric activators by comparing expression in  
202 WT vs *Δmed15*. As previously found with Gcn4, all chimeric ADs showed the strongest Med15  
203 dependence at *ARG3* and somewhat lower dependence at *HIS4* (**Fig 1; Fig 2B**) The one outlier  
204 among these ADs is the Rtg3 N-terminal AD which showed no Med15 dependence at *HIS4*.  
205 From these results, we conclude that nearly all of these ADs function similarly to Gcn4.

206

### 207 **Met4 contains tandem conserved ADs that overlap with ubiquitin-binding domains.**

208 Based on in vivo activity, sequence conservation, and previously published work, we focused  
209 further characterization on the Met4 and Ino2 ADs. **Fig 3** shows that Met4 residues 65-170 is  
210 enriched in both hydrophobic and acidic residues and that it contains tandem 22 residue long  
211 sequence blocks that are conserved among closely related yeasts. Both of these conserved  
212 regions are predicted to have propensity for alpha helix formation (**Fig 3**).

213

214 Yeast Met4 is a bZIP protein that activates the transcription of at least 45 genes involved in  
215 sulfur metabolism (42, 43). Met4 is recruited to regulatory regions by the DNA binding proteins  
216 CBF1 and the related factors Met31/32, while cofactor Met28 acts to stabilize these DNA-  
217 bound complexes (44, 45). Prior analysis of Met4-LexA fusions showed that Met4 residues 79-  
218 160 contains transcription activation function (35). Met4 activator function is known to be  
219 regulated by both ubiquitylation and by Ub binding. Met4 is modified by a relatively short poly  
220 Ub chain at residue K163 (46), located at the C-terminal edge of the second conserved  
221 sequence block. Eliminating ubiquitylation by the mutation K163R activates Met4 similarly to  
222 growth in inducing conditions but has little if any effect on protein stability. These findings  
223 suggest that Met4-Ub regulates function separately from proteolysis (47, 48). Met4 also  
224 contains tandem Ub-binding domains defined by mutations  $\Delta 85-96$  and  $\Delta 135-155$  (49).  
225 Inactivation of these domains leads to longer Met4 poly Ub chains and decreased protein  
226 stability, showing that Ub binding protects Met4 from protein degradation. The Ub-binding  
227 domains are contained within the region required for transcription activation and it has not  
228 been determined whether these activities are overlapping or independent functions.

229



230 A series of deletions was constructed in the Met4-Gcn4 fusion to identify the minimal regions  
231 necessary for AD function at *ARG3*, *HIS4* and *ILV6* (**Fig 4**). As with the other chimeric activators  
232 above, protein expression levels did not correlate with AD function (**Fig S1**). Consistent with  
233 previous observations, Met4 residues 72-160 encode 85-92% of Met4 AD function (35). Further  
234 deletions demonstrated that Met4 contains tandem ADs, with the functional regions centered  
235 on the two conserved sequence blocks. Met4 72-116 contains 34-62% of Met4 AD function,  
236 depending on the activated gene. Met4 126-160 contains 18-55% of Met4 AD function, again  
237 depending on the target gene. Because of this gene-specific activation function, the two Met4  
238 ADs synergize at *ARG3* but are approximately additive in activity at *HIS4*. We speculate that this  
239 may be due to different coactivator dependencies at these genes.

240  
241 The deletion analysis also found that Met4 residues 161-168 repress AD function 40-50%. Part  
242 of this region is conserved and contains the ubiquitinated residue K163 (47, 48). Western  
243 analysis is consistent with modification at this residue as this fusion protein migrates in a series  
244 of slower mobility species in SDS PAGE (**Fig S1**), although protein levels appear unchanged  
245 compared to Met4 1-160-Gcn4. All derivatives lacking residues 161-168 show no apparent  
246 modification. Mutation of K163 to R in the 1-168-Gcn4 construct eliminates both this protein  
247 modification and repressive function (**Fig 4; Fig S3**). Unexpectedly, blocking ubiquitination led  
248 to lower levels of the fusion protein. This again shows that there is little or no correspondence  
249 between protein levels and activation activity in this system.

250  
251 We next examined the importance of conserved and acidic residues within each Met4 AD for  
252 transcription of *ARG3* and *HIS4* (**Fig 5**). For Met4 72-116, alanine substitution at three blocks of  
253 conserved hydrophobic residues showed at least a 2-fold decrease in function at one or both of  
254 the Gcn4-activated genes. In contrast, mutation of two conserved acidic residues gave no more  
255 than a 40% decrease in function. Therefore, like at Gcn4, the hydrophobic residues, not the  
256 acidic residues are most important for function. A similar finding was observed with the second  
257 AD, Met4 131-160, where three groups of hydrophobic residues are important for function  
258 while mutation of two groups of acidic residues showed no major decrease in activity.

259

260 As described above, Met4 contains tandem Ub-binding domains that overlap the two  
261 conserved sequence blocks in the AD region. To test whether Ub binding and AD function are  
262 separable, we tested three mutations that are known to inhibit or eliminate Ub binding (**Fig 5**).  
263 Within the 72-116 AD, mutations T86A and T86E, are both known to eliminate Ub binding (An  
264 Tyrrell, Karin Flick, and Peter Kaiser, personal communication). These two mutants retained at  
265 least 96% wild type function with no major changes in protein level (**Fig S3**). Mutation A145G in  
266 the context of residues 131-160, a mutation known to limit Ub binding (47), also caused no  
267 decrease in AD function but did significantly reduce fusion protein levels (**Fig S3**). Therefore, we  
268 conclude that the Ub binding function of Met4 is not required for activator function, although  
269 the two sequences overlap.

270

### 271 **Ino2 contains tandem conserved ADs that require both hydrophobic and acidic residues for** 272 **function**

273 Next, we examined residues important for Ino2 AD function in the Gcn4 chimeras. Ino2 and  
274 Ino4 are bHLH factors required for transcriptional regulation of yeast structural genes involved  
275 in phospholipid biosynthesis. Both proteins are required for sequence-specific DNA binding but  
276 only Ino2 contains transcription activation function (36, 50). Previous analysis showed that,  
277 when fused to the Gal4 DBD, Ino2 residues 1-35 and 98-135 have activator function and were  
278 termed AD1 and AD2 (51). Mutagenesis of the AD1 showed that both hydrophobic and acidic  
279 residues are required for function. AD2 overlaps with the binding site for the repressor Opi1  
280 (Ino2 residues 118-135), that targets Ino2 to repress transcription in response to high levels of  
281 inositol and choline (52). Mutagenesis of AD2 suggested that residues required for Opi1-  
282 dependent repression and AD2 function only partially overlap.

283

284 Like Met4, the Ino2 AD region contains two blocks of conserved sequence enriched for  
285 hydrophobic and acidic residues of 29 and 21 residues that overlap with Ino2 AD1 and AD2 (**Fig**  
286 **3B**). Both of these conserved regions are predicted to have propensity for alpha helix  
287 formation. When fused to the Gcn4 DBD and, in agreement with earlier work, we found that

288 each of the two Ino2 ADs activate *ARG3* and *HIS4* (**Fig 6**). In our system, the minimal segments  
289 necessary for AD function are Ino2 residues 1-41 and 96-160. The intervening region between  
290 these two regions can be deleted with less than ~2-fold decrease in function. Unexpectedly, we  
291 found that the C-terminal AD contained a region that repressed function. Deletion of residues  
292 143-150 increased activator function 2-3-fold depending on the promoter assayed (**Fig 6**;  
293 orange rectangle). There were no obvious features in the sequence of this region that explain  
294 this repressive activity. Although the Ino2 C-terminal AD is reportedly targeted by the Opi1  
295 repressor (52), we found that activity of neither AD was repressed by the addition of inositol  
296 and choline (not shown). This is consistent with a report that chimeric Ino2-LexA constructs  
297 lacking the Ino2 DBD, are refractory to Opi1 repression (53).

298  
299 To explore residues important for function of the Ino2 ADs beyond those found in previous  
300 work, we mutagenized the individual ADs by double or triple substitution of Ala for  
301 hydrophobic, acidic and polar residues. Function was monitored at *ARG3* and *HIS3* under +SM  
302 inducing conditions. Residues required for the Ino2 N-terminal AD were distributed over 29  
303 amino acids, almost all of which were in the conserved sequence block (**Fig 7**). We found that 5  
304 sets of hydrophobic mutations reduced activity ~50% or more on at least one Gcn4-dependent  
305 gene. In addition, a triple mutation of conserved acidic residues was as detrimental as most  
306 mutations of hydrophobic residues. For the C-terminal AD, we found that mutations reducing  
307 function were located within a 40-residue segment, much larger than the conserved sequence  
308 block (**Fig 7**). Ala substitutions that reduced function by at least 60% on one or both of the  
309 Gcn4-dependent genes included 5 sets of hydrophobic residues and one triple mutation of  
310 three conserved acidic residues. Unique to this AD, we found that mutation of conserved  
311 residues S120, T121 to Ala reduced activity by at least 4-fold. Two mutations of other polar  
312 residues did not affect function. In summary, residues important for both Ino2 ADs are  
313 distributed over 29-40 residues and include both hydrophobic, and acidic side chains.

314

315 **Met4 and Ino2 bind multiple Med15 activator binding domains**

316 To explore the interactions between Med15 and the Ino2 and Met4 tandem ADs, we used  
317 purified proteins in combination with isothermal titration calorimetry (ITC) and/or fluorescence  
318 polarization (FP) to measure the affinities and thermodynamic properties of these interactions  
319 (**Figures 8-10**; summarized in **Table 1**). Binding between the ADs and the individual Med15  
320 activator binding domains was monitored using ITC. We were not able to use ITC to monitor  
321 binding to the longer Med15 polypeptides (KIX + ABD1,2,3 and ABD1,2,3) so FP was employed  
322 to monitor N-terminal fluorescently-labeled AD peptides binding to Med15. For comparison of  
323 the two methods we used FP and ITC to monitor AD binding to ABD3 and the results were  
324 similar. Met4 affinities monitored by either approach were within 20% and Ino2 affinities were  
325 within ~3-fold. For the discussion below, the affinities are compared using the ITC values where  
326 available.

327  
328 For both ADs, we were unable to detect binding to the Med15 KIX domain. This behavior is  
329 identical to that of the Gcn4 ADs (27). In contrast, both ADs bound to ABD1, 2, and 3. For Met4,  
330 the order of highest to lowest binding was ABD3>ABD1>ABD2 with affinities ranging from 1 to  
331 20 micromolar. The relative order of Ino2 interactions was the same, but all of the individual  
332 interactions were weaker compared to Met4, ranging from 8-34 micromolar. Highest affinity  
333 interactions were with Med15 polypeptides containing all ABDs: KIX + ABD1,2,3 and ABD1,2,3.  
334 For both activators, constructs containing the KIX domain had the highest affinity for the ADs  
335 even though binding to the isolated KIX domain was undetectable in our assays. This is  
336 consistent with results found for Gcn4, where the KIX domains seemed as functionally  
337 important as any of the Med15 ABDs (27) and where KIX + ABD1,2,3 had the highest affinity for  
338 the tandem Gcn4 ADs (20). Combined, our results show that Med15 polypeptides with multiple  
339 ABDs have much higher affinity for Met4 and Ino2. For example, Met4 binds KIX + ABD1,2,3  
340 with ~7-fold higher affinity compared with ABD3 (Kd of 0.196 versus 1.36 micromolar) and Ino2  
341 binds KIX + ABD1,2,3 with 36-fold higher affinity compared with ABD3 (Kd of 0.21 vs 7.8  
342 micromolar). Finally, despite our finding that the Met4 had higher affinity than Ino2 for the  
343 individual Med15 ABDs, the affinity of Ino2 and Met4 for the longer Med15 polypeptides was  
344 remarkably similar (Kd ~0.2 micromolar for KIX + ABD1,2,3 and ~0.3 micromolar for ABD1,2,3).

345  
346 Our previous work showed different thermodynamic behavior in the mechanism of Med15  
347 binding to the two Gcn4 ADs (6). For example, the Gcn4 central activation domain (cAD) binding  
348 to ABD1 is exothermic with a favorable change in enthalpy and a small but positive entropy  
349 change. In contrast, the Gcn4 nAD binding to the individual Med15 ABD1, 2, and 3 domains are  
350 endothermic, with unfavorable changes in enthalpy counteracted by large positive changes in  
351 entropy. Binding of Met4 and Ino2 ADs also showed surprising and varied thermodynamic  
352 behavior depending on the combination of activator and Med15 ABD (**Figs 8, 10 and Table 1**).  
353 For example, binding of Gcn4 nAD, Met4 AD and Ino2 AD to ABD3 is consistently endothermic.  
354 In contrast, binding to ABD1 and ABD2 can be endo or exothermic depending on the activator.

### 355 356 **Crosslinking reveals heterogeneous AD-ABD interactions within the Met4-Med15 complex**

357 The individual binding measurements above showed that Met4 and Ino2 interact with both the  
358 individual ABDs and longer Med15 polypeptides but these experiments cannot show whether  
359 the relative affinity or ABD specificity changes in the larger complexes. For example, these  
360 studies show that the KIX domain contributes to overall affinity, but does not answer whether  
361 there is a direct contact between the AD and KIX. To examine the binding mechanism of the  
362 Met4 tandem ADs with the full-length Med15 activator-binding regions, we used the crosslinker  
363 EDC, which crosslinks acidic side chains to lysine (**Fig 11; Table S2**). EDC is a zero-length  
364 crosslinker, linking only closely positioned residues and leaving no linker in the crosslinked  
365 product. Analysis of the crosslinked products by mass spectrometry identified crosslinks  
366 between the individual Met4 ADs and Med15 KIX, ABD1, ABD2 and ABD3. All of the  
367 intermolecular crosslinks were between acidic residues in Met4 and lysine residues in Med15.  
368 Surprisingly, fewer crosslinks were detected with ABD3, which individually has the highest  
369 affinity for Met4 compared to the other ABDs. Our combined results show that Met4 makes  
370 direct contacts with KIX and that there is no unique protein complex formed upon binding of  
371 Met4 to Med15. Rather, our results are consistent with the tandem ADs rapidly sampling the  
372 Med15 ABDs in a large dynamic fuzzy complex as previously proposed (6).

373

## 374 **Discussion**

375 Compared with most protein-protein interactions, interactions of transcription activators with  
376 their targets are unusual. The primary sequence of ADs is not obviously conserved among  
377 different activators, the factors are intrinsically disordered and they interact with multiple  
378 distinct targets having no obvious similarity. However, these properties undoubtedly allow  
379 many activators to function through a variety of coactivators and to modulate transcription at  
380 varied promoters with different coactivator requirements. Here, we have focused our  
381 investigations on characterizing two strong yeast activators, Met4 and Ino2, to identify  
382 common and distinct features of yeast ADs. Examining Met 4, Ino2, and 7 other strong yeast  
383 activation domains, we found that all but one has similar dependence on the Mediator Tail  
384 module subunit Med15 for activation of two TATA-containing reporter genes.

385  
386 Like Gcn4, both Met4 and Ino2 have tandem ADs that are enriched for acidic and hydrophobic  
387 residues. Tandem ADs may be another feature common to strong activators in eukaryotes, as  
388 mammalian viral and human activators such as VP16 and p53 also have tandem ADs. For Met4  
389 and Ino2, these individual ADs were identified both functionally and as blocks of moderately  
390 conserved sequences with helical propensity imbedded in non-conserved flanking sequences.  
391 This, along with previous work shows that, although ADs do not have a common primary  
392 sequence motif, there are specific sequence requirements that constitute a functional AD.

393  
394 Both individual ADs of Met4 are of intermediate length: the conserved sequence blocks are 22  
395 residues long for both and mutagenesis of conserved residues shows that conserved sequences  
396 of 13 and 15 residues long are required for most of the AD function. Mutagenesis of the ADs  
397 found that only hydrophobic residues were critical for normal function – identical to the finding  
398 of critical hydrophobic but not acidic residues in the Gcn4 ADs (18, 19, 24). The individual Ino2  
399 ADs are larger than Met4 ADs with 29 and 21 residue conserved sequence blocks. Mutagenesis  
400 of the N-terminal AD found that a stretch of 29 residues was required for maximum function  
401 that almost precisely coincided with the conserved sequence block. However, the C-terminal  
402 AD was larger with functionally important amino acids distributed over a span of 40 residues.

403 We also found that both Ino2 ADs contained functionally important hydrophobic and acidic  
404 residues. The acidic residues may function through non-specific electrostatic interactions with  
405 the coactivator targets or alternatively may make direct and specific contacts.

406

407 Monitoring the binding of Ino2 and Met4 to Med15 showed that they behaved in many  
408 respects like Gcn4. All bind Med15 ABD1, ABD2, and ABD3 with micromolar affinity and binding  
409 to the Med15 KIX domain is undetectable in our assays. Binding of the tandem ADs to larger  
410 Med15 polypeptides all have much higher affinity compared to the individual ABDs and the KIX  
411 domain contributes to overall affinity under these conditions. These biochemical findings are  
412 consistent with our earlier study that showed the normal in vivo response to Gcn4 activation  
413 requires multiple Med15 ABDs and the KIX domain. It seems likely that, since these individual  
414 binding interactions are weak, multiple binding sites are required to increase the affinity and  
415 specificity into a biologically meaningful range (54, 55).

416

417 An unexpected observation with Gcn4, Met4 and Ino2 binding to Med15 is that interactions  
418 with the individual ABDs could be either exo or endothermic. The endothermic interactions all  
419 have large unfavorable changes in enthalpy and are driven by large positive changes in entropy.  
420 This behavior is opposite from that expected because of the entropic penalty paid upon binding  
421 of a disordered protein. However, it has been proposed that, even in the bound state, IDPs can  
422 retain conformational entropy due to “fuzzy” protein interfaces and conformational flexibility  
423 of the protein region not in direct contact with the binding partner (56). However, these  
424 mechanisms do not seem to fully explain the large, positive entropy changes observed. At this  
425 time, we do not understand the mechanism for the large increase in entropy upon binding, but  
426 it seems to be ABD and activator-specific and is likely to at least partially result from release of  
427 solvent during binding. As an example of thermodynamic specificity, binding of ABD3 to Gcn4,  
428 Met4 and Ino2 is endothermic while the thermodynamics of binding to ABD1 and ABD2 is  
429 activator-specific. Understanding the mechanism of endothermic binding will be important for  
430 not only understanding activator mechanisms and specificity but more generally as a  
431 mechanism likely used for molecular recognition by other disordered proteins.

432

433 Finally, the Met4-Med15 crosslinking experiments allowed us to probe larger and more  
434 physiologically relevant complexes. Upon mixing the Met4 tandem ADs with KIX + ABD1,2,3,  
435 crosslinking revealed that the individual Met4 ADs directly interact with each of the Med15  
436 structured domains. This shows that there is no unique Met4-Med15 protein complex and is  
437 consistent with the model that multiple Gcn4 ADs rapidly sample individual Med15 ABDs in a  
438 large dynamic fuzzy complex (20). Since this crosslinking behavior is identical to that observed  
439 with Gcn4, and because Met4 and Ino2 have generally similar properties, we think it likely that  
440 all three activators function by similar mechanisms. In the future, it will be important to  
441 understand more about both the biochemical properties of these interactions, and how often  
442 eukaryotic activators use this mode of protein-protein interaction.

443



444 **Author contributions**

445 DP, LW, MB, HR, and SH performed all experimental work. DP purified proteins, measured  
446 binding affinities and, along with MB, performed and analyzed crosslinking reactions. LW, HR,  
447 and SH created fusion proteins and derivatives and LW and HR analyzed activator function and  
448 protein expression. JL and JR performed crosslinking-MS analysis. DP, LW, and SH wrote the  
449 paper.

450

451 **Acknowledgements**

452 We thank Johannes Soeding and Eckhardt Guthöhrlein (Max Plank, Göttingen and the Gene  
453 Center, Munich) for many insightful discussions and analysis of the Ino2 and Met4 AD  
454 sequences, Peter Kaiser (UC Irvine) for discussions and permission to cite unpublished work,  
455 Laurent Kuras (CEA, CNRS, Université Paris Sud) for discussions, Members of the Hahn lab for  
456 assistance and comments during the course of this work, and Lisa Tuttle for comments on the  
457 manuscript. Funded by grant from UW School of Medicine to HR and MB, 2P50GM076547 and  
458 5R01GM110064 to JR, and NIH grant 5R01GM075114 to SH. HR and MB were affiliated with  
459 the University of Washington Medical Student Research Training Program.

460

461

462

463 **Table and Figure Legends**

464

465 **Table 1. Affinity of Met4 and Ino2 ADs binding to Med15 derivatives.**

466 (A) Affinity of Met4-Med15 interactions. ITC: isothermal titration calorimetry; FP: fluorescence  
467 polarization. For ITC measurements, calculated values of  $\Delta H$  cal/mole (enthalpy),  $\Delta S$   
468 cal/mole/deg (entropy) and N (molar ratio) are given. NM = not measurable; N/A not  
469 applicable. Proteins used are Met4: 72-160; Med15 KIX: 6-90; Med15 ABD1: 158-238; Med15  
470 ABD2: 277-368; Med15 ABD3: 484-651; Med15 ABD1,2,3; 158-651  $\Delta 239-272$ ,  $\Delta 373-483$ ; Med15  
471 KIX+ABD1,2,3: 1-651  $\Delta 239-272$ ,  $\Delta 373-483$ .

472 (B) Affinity of Ino2-Med15 interactions. Same nomenclature as in (A). Proteins used are Ino2: 1-  
473 41-(GS)<sub>3</sub>-96-160; Med15 KIX: 6-90; Med15 ABD1: 158-238; Med15 ABD2: 277-368; Med15  
474 ABD3: 484-651; Med15 ABD1,2,3; 158-651  $\Delta 239-272$ ,  $\Delta 373-483$ ; Med15 KIX+ABD1,2,3: 1-651  
475  $\Delta 239-272$ ,  $\Delta 373-483$ .

476

477 **Figure 1.** Activity of yeast transcription factor AD – Gcn4 DBD fusions at two Gcn4 inducible  
478 genes. Previously defined AD regions were fused to Gcn4 residues 125-281 and expressed  
479 under control of the Gcn4 gene regulatory region. Gcn4 inducing conditions were initiated by  
480 addition of SM for 90 min. and mRNA levels from *ARG3* and *HIS4* were quantitated by RT qPCR.  
481 Measurements were made in both *MED15* and *med15* $\Delta$  strains as indicated.

482

483 **Figure 2.** Expression of Gcn4 fusion proteins and Med15-dependence. (A) Western blot of  
484 whole cell extracts from cells used in Figure 1. Western was probed with anti Gcn4 and anti  
485 Tfg2 (TFIIF subunit) as indicated. (B). Mediator tail module dependence for the different  
486 activators at two Gcn4-responsive genes measured as the ratio of mRNA levels in the  
487 *med15* $\Delta$ /*MED15* strains. Data from Figure 1.

488

489 **Figure 3.** Conservation of activation domains in closely related yeasts. (A) Met4 and (B) Ino2  
490 sequences aligned by Clustal Omega (57) with secondary structure predictions from Ali2D (58).

491

492 **Figure 4.** Met4 tandem activation domains. Shown are the Met4 derivatives fused to Gcn4 and  
493 assayed for activation of *ARG3*, *HIS4* and *ILV6* as in Figure 1. Protein segments are shaded  
494 according to the percent activity compared with 1-160. Red dotted lines indicate the two  
495 conserved sequence blocks from Figure 3. The orange block indicates a repressive element and  
496 the \* indicates the K163R mutation that blocks protein ubiquitylation. Red brackets indicate the  
497 limits of the individual ADs at *ARG3* and the percent activity at *ARG3* compared to Met4 1-160.

498

499 **Figure 5.** Hydrophobic but not acidic residues are important for Met4 AD function. (A) and (B)  
500 show mutations in the two Met4 ADs that were targeted for Alanine substitution and the  
501 resulting effects on induced expression from *ARG3* and *HIS4*. Residues are color coded by  
502 amino acid type. Secondary structure predictions and sequence conservation is from Fig 3. (C)  
503 Quantitation of Met4-Gcn4 fusion protein activity measured by RT qPCR. Data used for (A and  
504 B).

505

506 **Figure 6.** Activity of the Ino2 tandem activation domains. (A) Shown are the Ino2 derivatives  
507 fused to Gcn4 and assayed for activation of *ARG3* and *HIS4* as in Figure 1. Red dotted lines  
508 indicate the two conserved sequence blocks from Figure 3. The orange block indicates an  
509 inhibitory element. Red brackets indicate the limits of the two ADs at *ARG3* and the percent  
510 activity on *ARG3* compared to Ino2 1-160.

511

512 **Figure 7.** Hydrophobic, acidic, and polar residues are important for Ino2 AD function. (A) and (B)  
513 show mutations in the two Ino2 ADs that were targeted for Alanine substitution and the  
514 resulting effects on induced expression from *ARG3* and *HIS4*. Residues are color coded by  
515 amino acid type. Secondary structure predictions and sequence conservation is from Fig 3. (C)  
516 Quantitation of Ino2-Gcn4 fusion protein activity measured by RT qPCR.

517

518 **Figure 8.** Measurement of Met4-Med15 binding by Isothermal titration calorimetry. ITC was  
519 used to determine the affinity and thermodynamic parameters of Met4 72-160 interactions

520 with the Med15 KIX domain (**A**), Med15 ABD1 (**B**), Med15 ABD2 (**C**), and Med15 ABD3 (**D**). All  
521 assays were performed and curves were fit as described in Materials and Methods.

522

523 **Figure 9.** Measurement of activator-Med15 binding by Fluorescence Polarization. FP was used  
524 to assay binding of Oregon Green-labeled Met4 72-160 (**A**) or Ino2 1-41-(GS)<sub>3</sub>-96-160 (**B**) to  
525 Med15 ABD3, Med15 ABD123, and Med15 KIX+ ABD123. All assays were performed in  
526 triplicate, curves were fit as described in Materials and Methods.

527

528 **Figure 10.** Measurement of Ino2-Med15 binding. ITC was used to determine the affinity and  
529 thermodynamic parameters of Ino2 1-41-(GS)<sub>3</sub>-96-160 interactions with the Med15 KIX domain  
530 (**A**), Med15 ABD1 (**B**), Med15 ABD2 (**C**), and Med15 ABD3 (**D**). All assays were performed and  
531 curves were fit as described in Materials and Methods.

532

533 **Figure 11.** Met4 ADs interacts via a heterogeneous complex with the three ABDs of Med15.  
534 Mass spectrometry crosslinking experiments show crosslinks are formed between regions  
535 throughout Met4 AD and each of the Med15 ABD regions and to KIX. Crosslinks between Met4  
536 72-160 and Med15 KIX123 are shown in the context of Met4 1-160 and Med15 1-651. Deleted  
537 regions are indicated by the grey boxes. Red bars indicate lysine residues. Blue bars indicate  
538 aspartic acid and glutamic acid residues. Conserved regions of the Met4 AD are shaded pink.  
539 Regions of Med15 containing the ABDs are colored as follows: KIX (aa 6-90), yellow; ABD1 (aa  
540 158-238), orange; ABD2 (aa 272-372), green; ABD3 (aa 484-651), purple.

541

542

543

544 **Supplementary Tables and Figures**

545

546 **Table S1.** Strains and Plasmids used in this work.

547

548 **Table S2.** Summary of EDC crosslinks within the Met4 72-160 - Med15 KIX123 complex

549

550 **Figure S1.** Protein expression of Met4-Gcn4 derivatives. Shown are Western blots analyzing  
551 whole cell extracts of cells used for the RT qPCR assays. Blots were probed with anti FLAG or  
552 Tfg2 (TFIIF subunit) as indicated.

553

554 **Figure S2.** Protein expression of Ino2-Gcn4 derivatives. Shown are Western blots analyzing  
555 whole cell extracts of cells used for the RT qPCR assays. Blots were probed with anti FLAG.

556

557 **Figure S3.** Protein expression of Ino2 and Met4-Gcn4 derivatives. Shown are Western blots  
558 analyzing whole cell extracts of cells used for the RT qPCR assays. Blots were probed with anti  
559 Gcn4 and anti Tfg2.

560

561 **Table 1. Affinity of Met4 and Ino2 ADs for Med15 derivatives.**

562

563 **(A) Affinity of Met4-Med15 interactions.**

| Med15        | Kd ( $\mu\text{M}$ ) | $\Delta\text{H}$ | $\Delta\text{S}$ | N    | Method |
|--------------|----------------------|------------------|------------------|------|--------|
| KIX          | NM                   | N/A              | N/A              | N/A  | ITC    |
| ABD1         | $5.9 \pm 0.5$        | $1780 \pm 26$    | 30               | 0.85 | ITC    |
| ABD2         | $20.4 \pm 3.4$       | $3789 \pm 335$   | 34.3             | 0.80 | ITC    |
| ABD3         | $1.36 \pm 0.1$       | $8920 \pm 46$    | 57               | 1.01 | ITC    |
| ABD3         | $1.11 \pm 0.23$      | N/A              | N/A              | N/A  | FP     |
| ABD1,2,3     | $0.283 \pm 0.027$    | N/A              | N/A              | N/A  | FP     |
| KIX+ABD1,2,3 | $0.196 \pm 0.015$    | N/A              | N/A              | N/A  | FP     |

564

565

566

567

**(B) Affinity of Ino2-Med15 interactions**

| Med15        | Kd ( $\mu\text{M}$ ) | $\Delta\text{H}$ | $\Delta\text{S}$ | N    | Method |
|--------------|----------------------|------------------|------------------|------|--------|
| KIX          | NM                   | N/A              | N/A              | N/A  | ITC    |
| ABD1         | $25.3 \pm 3.4$       | $-4916 \pm 286$  | 4.4              | 0.85 | ITC    |
| ABD2         | $33.8 \pm 3.6$       | $-2440 \pm 73$   | 12.2             | 1.48 | ITC    |
| ABD3         | $7.75 \pm 0.9$       | $2250 \pm 61$    | 31               | 0.66 | ITC    |
| ABD3         | $2.33 \pm 0.4$       | N/A              | N/A              | N/A  | FP     |
| ABD1,2,3     | $0.314 \pm 0.051$    | N/A              | N/A              | N/A  | FP     |
| KIX+ABD1,2,3 | $0.213 \pm 0.019$    | N/A              | N/A              | N/A  | FP     |

568

569

570

571 **References**

572

- 573 1. **Spitz F, Furlong EEM.** 2012. Transcription factors: from enhancer binding to  
574 developmental control. *Nat Rev Genet* **13**:613–626.
- 575 2. **Levine M, Cattoglio C, Tjian R.** 2014. Looping back to leap forward: transcription enters a  
576 new era. *Cell* **157**:13–25.
- 577 3. **Hahn S, Young ET.** 2011. Transcriptional regulation in *Saccharomyces cerevisiae*:  
578 transcription factor regulation and function, mechanisms of initiation, and roles of  
579 activators and coactivators. *Genetics* **189**:705–736.
- 580 4. **Weake VM, Workman JL.** 2010. Inducible gene expression: diverse regulatory  
581 mechanisms. *Nat Rev Genet* **11**:426–437.
- 582 5. **Ptashne M, Gann AA.** 1990. Activators and targets. *Nature* **346**:329–331.
- 583 6. **Brzovic PS, Heikaus CC, Kisselev L, Vernon R, Herbig E, Pacheco D, Warfield L, Littlefield**  
584 **P, Baker D, Klevit RE, Hahn S.** 2011. The acidic transcription activator Gcn4 binds the  
585 mediator subunit Gal11/Med15 using a simple protein interface forming a fuzzy complex.  
586 *Mol Cell* **44**:942–953.
- 587 7. **Feng H, Jenkins LMM, Durell SR, Hayashi R, Mazur SJ, Cherry S, Tropea JE, Miller M,**  
588 **Wlodawer A, Appella E, Bai Y.** 2009. Structural basis for p300 Taz2-p53 TAD1 binding and  
589 modulation by phosphorylation. *Structure/Folding and Design* **17**:202–210.
- 590 8. **Kussie PH, Gorina S, Marechal V, Elenbaas B, Moreau J, Levine AJ, Pavletich NP.** 1996.  
591 Structure of the MDM2 oncoprotein bound to the p53 tumor suppressor transactivation  
592 domain. *Science* **274**:948–953.
- 593 9. **Sigler PB.** 1988. Transcriptional activation. Acid blobs and negative noodles. *Nature*.
- 594 10. **Uesugi M, Nyanguile O, Lu H, Levine AJ, Verdine GL.** 1997. Induced alpha helix in the  
595 VP16 activation domain upon binding to a human TAF. *Science* **277**:1310–1313.
- 596 11. **Stein A, Pache RA, Bernadó P, Pons M, Aloy P.** 2009. Dynamic interactions of proteins in  
597 complex networks: a more structured view. *FEBS J* **276**:5390–5405.
- 598 12. **Nguyen Ba AN, Yeh BJ, van Dyk D, Davidson AR, Andrews BJ, Weiss EL, Moses AM.**  
599 2012. Proteome-wide discovery of evolutionary conserved sequences in disordered  
600 regions. *Science Signaling* **5**:rs1.
- 601 13. **Das RK, Mao AH, Pappu RV.** 2012. Unmasking functional motifs within disordered  
602 regions of proteins. *Science Signaling* **5**:pe17.

- 603 14. **Gould CM, Diella F, Via A, Puntervoll P, Gemünd C, Chabanis-Davidson S, Michael S,**  
604 **Sayadi A, Bryne JC, Chica C, Seiler M, Davey NE, Haslam N, Weatheritt RJ, Budd A,**  
605 **Hughes T, Pas J, Rychlewski L, Trave G, Aasland R, Helmer-Citterich M, Linding R, Gibson**  
606 **TJ.** 2010. ELM: the status of the 2010 eukaryotic linear motif resource. *Nucleic Acids Res*  
607 **38:D167–80.**
- 608 15. **Mitchell PJ, Tjian R.** 1989. Transcriptional regulation in mammalian cells by sequence-  
609 specific DNA binding proteins. *Science* **245:371–378.**
- 610 16. **Ptashne M, Gann A.** 1997. Transcriptional activation by recruitment. *Nature* **386:569–**  
611 **577.**
- 612 17. **Tompa P.** 2002. Intrinsically unstructured proteins. *Trends in Biochemical Sciences*  
613 **27:527–533.**
- 614 18. **Warfield L, Tuttle LM, Pacheco D, Klevit RE, Hahn S.** 2014. A sequence-specific  
615 transcription activator motif and powerful synthetic variants that bind Mediator using a  
616 fuzzy protein interface. *Proceedings of the National Academy of Sciences* **111:E3506–13.**
- 617 19. **Drysdale CM, Dueñas E, Jackson BM, Reusser U, Braus GH, Hinnebusch AG.** 1995. The  
618 transcriptional activator GCN4 contains multiple activation domains that are critically  
619 dependent on hydrophobic amino acids. *Mol Cell Biol* **15:1220–1233.**
- 620 20. **Tuttle LM, Pacheco D, Warfield L, Luo J, Ranish J, Hahn S, Klevit RE.** 2017. Transcription  
621 activator-coactivator specificity is mediated by a large and dynamic fuzzy protein-protein  
622 complex. *bioRxiv* 1–44. DOI: 10.1101–221747.
- 623 21. **Erkina TY, Erkine AM.** 2016. Nucleosome distortion as a possible mechanism of  
624 transcription activation domain function. *Epigenetics & chromatin* **9:40.**
- 625 22. **Qiu H, Chereji RV, Hu C, Cole HA, Rawal Y, Clark DJ, Hinnebusch AG.** 2016. Genome-  
626 wide cooperation by HAT Gcn5, remodeler SWI/SNF, and chaperone Ydj1 in promoter  
627 nucleosome eviction and transcriptional activation. *Genome Res* **26:211–225.**
- 628 23. **Mittal N, Guimaraes JC, Gross T, Schmidt A, Vina-Vilaseca A, Nedialkova DD,**  
629 **Aeschmann F, Leidel SA, Spang A, Zavolan M.** 2017. The Gcn4 transcription factor  
630 reduces protein synthesis capacity and extends yeast lifespan. *Nat Commun* **8:457.**
- 631 24. **Jackson BM, Drysdale CM, Natarajan K, Hinnebusch AG.** 1996. Identification of seven  
632 hydrophobic clusters in GCN4 making redundant contributions to transcriptional  
633 activation. *Mol Cell Biol* **16:5557–5571.**
- 634 25. **Brown CE, Howe L, Sousa K, Alley SC, Carrozza MJ, Tan S, Workman JL.** 2001.  
635 Recruitment of HAT complexes by direct activator interactions with the ATM-related Tra1  
636 subunit. *Science* **292:2333–2337.**



- 637 26. **Fishburn J, Mohibullah N, Hahn S.** 2005. Function of a eukaryotic transcription activator  
638 during the transcription cycle. *Mol Cell* **18**:369–378.
- 639 27. **Herbig E, Warfield L, Fish L, Fishburn J, Knutson BA, Moorefield B, Pacheco D, Hahn S.**  
640 2010. Mechanism of Mediator recruitment by tandem Gcn4 activation domains and  
641 three Gal11 activator-binding domains. *Mol Cell Biol* **30**:2376–2390.
- 642 28. **Jedidi I, Zhang F, Qiu H, Stahl SJ, Palmer I, Kaufman JD, Nadaud PS, Mukherjee S,**  
643 **Wingfield PT, Jaroniec CP, Hinnebusch AG.** 2010. Activator Gcn4 Employs Multiple  
644 Segments of Med15/Gal11, Including the KIX Domain, to Recruit Mediator to Target  
645 Genes in Vivo. *J Biol Chem* **285**:2438–2455.
- 646 29. **Swanson MJ, Qiu H, Sumibcay L, Krueger A, Kim S-J, Natarajan K, Yoon S, Hinnebusch**  
647 **AG.** 2003. A multiplicity of coactivators is required by Gcn4p at individual promoters in  
648 vivo. *Mol Cell Biol* **23**:2800–2820.
- 649 30. **Yoon S, Qiu H, Swanson MJ, Hinnebusch AG.** 2003. Recruitment of SWI/SNF by Gcn4p  
650 does not require Snf2p or Gcn5p but depends strongly on SWI/SNF integrity, SRB  
651 mediator, and SAGA. *Mol Cell Biol* **23**:8829–8845.
- 652 31. **Di Lello P, Jenkins LMM, Jones TN, Nguyen BD, Hara T, Yamaguchi H, Dikeakos JD,**  
653 **Appella E, Legault P, Omichinski JG.** 2006. Structure of the Tfb1/p53 complex: Insights  
654 into the interaction between the p62/Tfb1 subunit of TFIID and the activation domain of  
655 p53. *Mol Cell* **22**:731–740.
- 656 32. **Langlois C, Mas C, Di Lello P, Jenkins LMM, Legault P, Omichinski JG.** 2008. NMR  
657 Structure of the Complex between the Tfb1 Subunit of TFIID and the Activation Domain  
658 of VP16: Structural Similarities between VP16 and p53. *J Am Chem Soc* **130**:10596–  
659 10604.
- 660 33. **Knutson BA, Luo J, Ranish J, Hahn S.** 2014. Architecture of the *Saccharomyces cerevisiae*  
661 RNA polymerase I Core Factor complex. *Nat Struct Mol Biol*.
- 662 34. **Donczew R, Hahn S.** 2017. Mechanistic differences in transcription initiation at TATA-less  
663 and TATA-containing promoters. *Mol Cell Biol* MCB.00448–17.
- 664 35. **Kuras L, Thomas D.** 1995. Functional analysis of Met4, a yeast transcriptional activator  
665 responsive to S-adenosylmethionine. *Mol Cell Biol* **15**:208–216.
- 666 36. **Schwank S, Ebbert R, Rautenstrauss K, Schweizer E, Schüller HJ.** 1995. Yeast  
667 transcriptional activator INO2 interacts as an Ino2p/Ino4p basic helix-loop-helix  
668 heteromeric complex with the inositol/choline-responsive element necessary for  
669 expression of phospholipid biosynthetic genes in *Saccharomyces cerevisiae*. *Nucleic Acids*  
670 *Res* **23**:230–237.
- 671 37. **Kolaczowska A, Kolaczowski M, Delahodde A, Goffeau A.** 2002. Functional dissection

- 672 of Pdr1p, a regulator of multidrug resistance in *Saccharomyces cerevisiae*. *Mol Genet*  
673 *Genomics* **267**:96–106.
- 674 38. **Stebbins JL, Triezenberg SJ.** 2004. Identification, mutational analysis, and coactivator  
675 requirements of two distinct transcriptional activation domains of the *Saccharomyces*  
676 *cerevisiae* Hap4 protein. *Eukaryotic Cell* **3**:339–347.
- 677 39. **Ma J, Ptashne M.** 1987. Deletion analysis of GAL4 defines two transcriptional activating  
678 segments. *Cell* **48**:847–853.
- 679 40. **Leuther KK, Salmeron JM, Johnston SA.** 1993. Genetic evidence that an activation  
680 domain of GAL4 does not require acidity and may form a beta sheet. *Cell* **72**:575–585.
- 681 41. **Rothermel BA, Thornton JL, Butow RA.** 1997. Rtg3p, a basic helix-loop-helix/leucine  
682 zipper protein that functions in mitochondrial-induced changes in gene expression,  
683 contains independent activation domains. *J Biol Chem* **272**:19801–19807.
- 684 42. **Thomas D, Jacquemin I, Surdin-Kerjan Y.** 1992. MET4, a leucine zipper protein, and  
685 centromere-binding factor 1 are both required for transcriptional activation of sulfur  
686 metabolism in *Saccharomyces cerevisiae*. *Mol Cell Biol* **12**:1719–1727.
- 687 43. **Lee TA, Jorgensen P, Bognar AL, Peyraud C, Thomas D, Tyers M.** 2010. Dissection of  
688 combinatorial control by the Met4 transcriptional complex. *Molecular Biology of the Cell*  
689 **21**:456–469.
- 690 44. **Kuras L, Cherest H, Surdin-Kerjan Y, Thomas D.** 1996. A heteromeric complex containing  
691 the centromere binding factor 1 and two basic leucine zipper factors, Met4 and Met28,  
692 mediates the transcription activation of yeast sulfur metabolism. *EMBO J* **15**:2519–2529.
- 693 45. **Blaiseau PL, Thomas D.** 1998. Multiple transcriptional activation complexes tether the  
694 yeast activator Met4 to DNA. *EMBO J* **17**:6327–6336.
- 695 46. **Flick K, Ouni I, Wohlschlegel JA, Capati C, McDonald WH, Yates JR, Kaiser P.** 2004.  
696 Proteolysis-independent regulation of the transcription factor Met4 by a single Lys 48-  
697 linked ubiquitin chain. *Nat Cell Biol* **6**:634–641.
- 698 47. **Flick K, Raasi S, Zhang H, Yen JL, Kaiser P.** 2006. A ubiquitin-interacting motif protects  
699 polyubiquitinated Met4 from degradation by the 26S proteasome. *Nat Cell Biol* **8**:509–  
700 515.
- 701 48. **Ouni I, Flick K, Kaiser P.** 2010. A transcriptional activator is part of an SCF ubiquitin ligase  
702 to control degradation of its cofactors. *Mol Cell* **40**:954–964.
- 703 49. **Tyrrell A, Flick K, Kleiger G, Zhang H, Deshaies RJ, Kaiser P.** 2010. Physiologically relevant  
704 and portable tandem ubiquitin-binding domain stabilizes polyubiquitylated proteins.  
705 *Proc Natl Acad Sci USA* **107**:19796–19801.

- 706 50. **Ambroziak J, Henry SA.** 1994. INO2 and INO4 gene products, positive regulators of  
707 phospholipid biosynthesis in *Saccharomyces cerevisiae*, form a complex that binds to the  
708 INO1 promoter. *J Biol Chem* **269**:15344–15349.
- 709 51. **Dietz M, Heyken W-T, Hoppen J, Geburtig S, Schüller H-J.** 2003. TFIIB and subunits of the  
710 SAGA complex are involved in transcriptional activation of phospholipid biosynthetic  
711 genes by the regulatory protein Ino2 in the yeast *Saccharomyces cerevisiae*. *Mol*  
712 *Microbiol* **48**:1119–1130.
- 713 52. **Heyken W-T, Repenning A, Kumme J, Schüller H-J.** 2005. Constitutive expression of yeast  
714 phospholipid biosynthetic genes by variants of Ino2 activator defective for interaction  
715 with Opi1 repressor. *Mol Microbiol* **56**:696–707.
- 716 53. **Kumme J, Dietz M, Wagner C, Schüller H-J.** 2008. Dimerization of yeast transcription  
717 factors Ino2 and Ino4 is regulated by precursors of phospholipid biosynthesis mediated  
718 by Opi1 repressor. *Curr Genet* **54**:35–45.
- 719 54. **Klein P, Pawson T, Tyers M.** 2003. Mathematical modeling suggests cooperative  
720 interactions between a disordered polyvalent ligand and a single receptor site. *Current*  
721 *Biology*.
- 722 55. **Olsen JG, Teilum K, Kragelund BB.** 2017. Behaviour of intrinsically disordered proteins in  
723 protein-protein complexes with an emphasis on fuzziness. *Cell Mol Life Sci* **12**:269–9.
- 724 56. **Flock T, Weatheritt RJ, Latysheva NS, Babu MM.** 2014. Controlling entropy to tune the  
725 functions of intrinsically disordered regions. *Curr Opin Struct Biol* **26**:62–72.
- 726 57. **Sievers F, Wilm A, Dineen D, Gibson TJ, Karplus K, Li W, Lopez R, McWilliam H,**  
727 **Remmert M, Söding J, Thompson JD, Higgins DG.** 2011. Fast, scalable generation of high-  
728 quality protein multiple sequence alignments using Clustal Omega. *Molecular Systems*  
729 *Biology* **7**:539–539.
- 730 58. **Alva V, Nam S-Z, Söding J, Lupas AN.** 2016. The MPI bioinformatics Toolkit as an  
731 integrative platform for advanced protein sequence and structure analysis. *Nucleic Acids*  
732 *Res* **44**:W410–5.
- 733 59. **Sikorski RS, Hieter P.** 1989. A system of shuttle vectors and yeast host strains designed  
734 for efficient manipulation of DNA in *Saccharomyces cerevisiae*. *Genetics* **122**:19–27.

735

# Figure 1

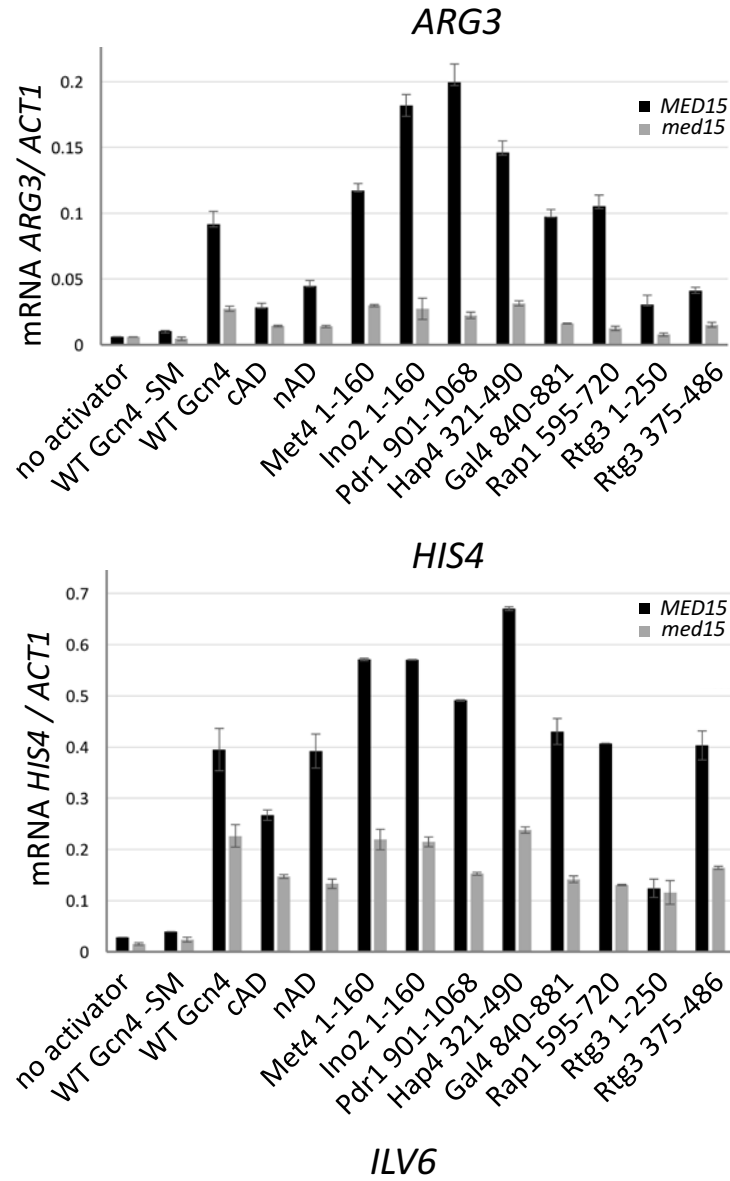

## Figure 2

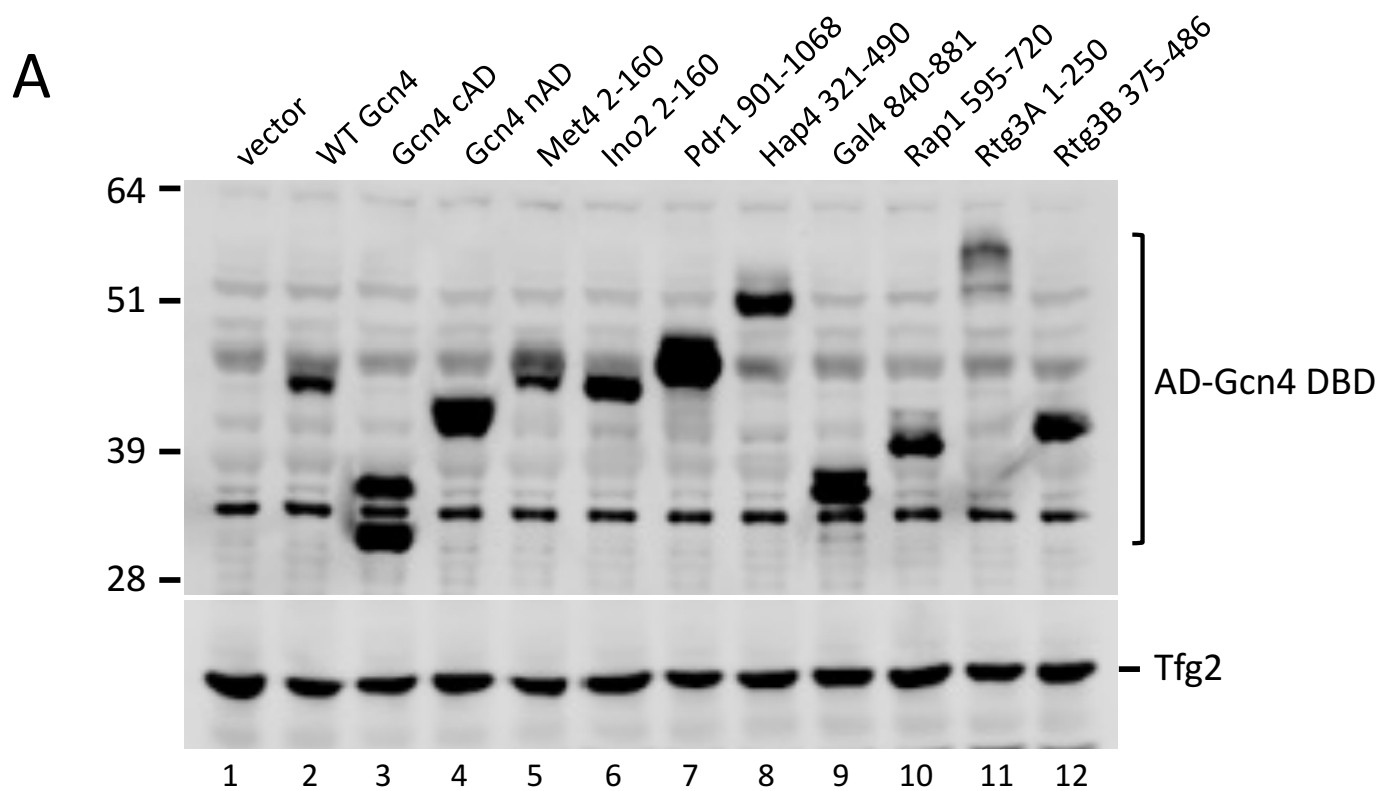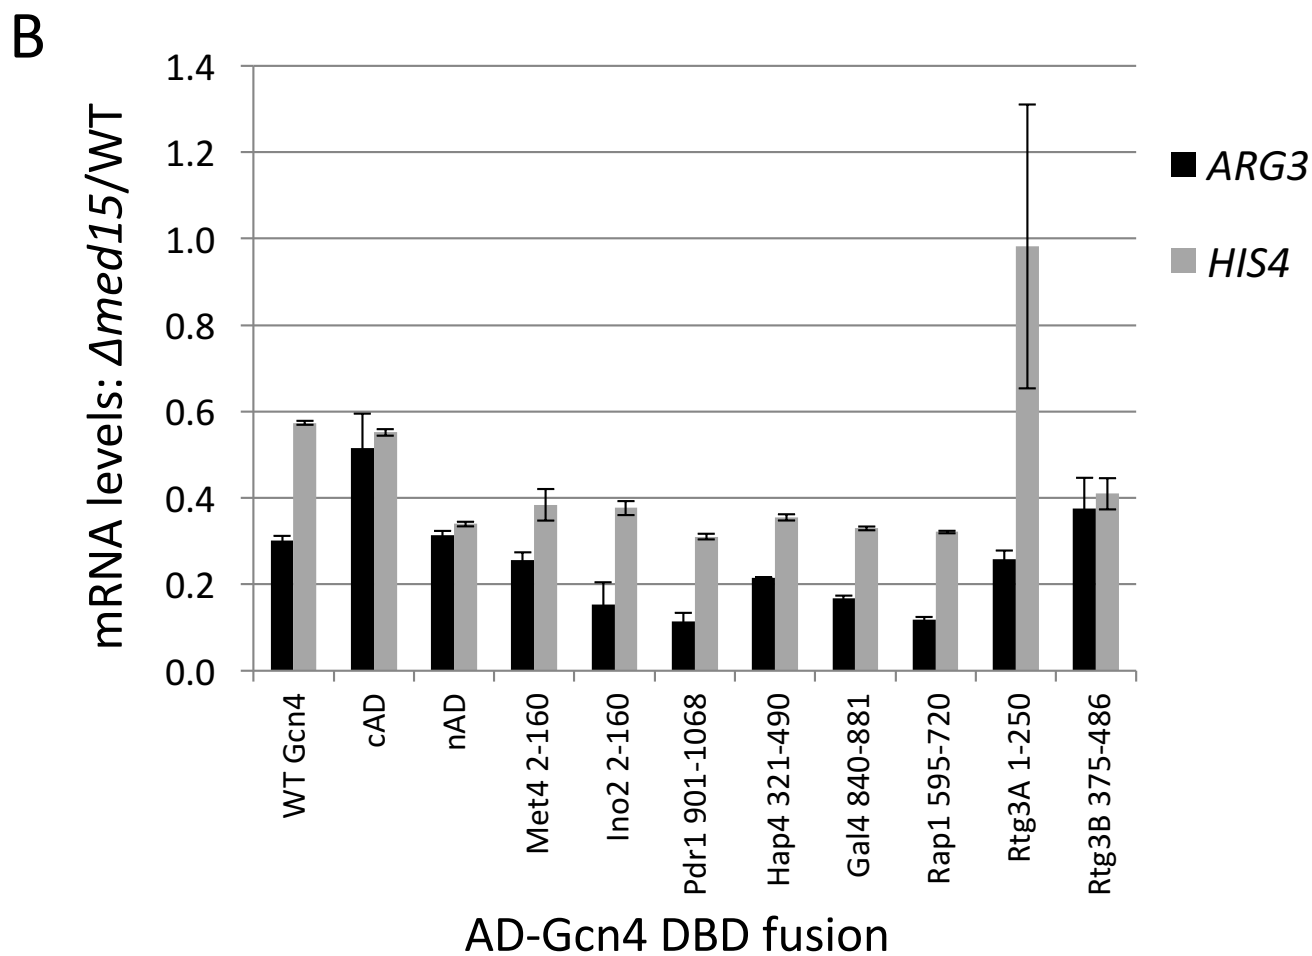

# Figure 3

## A Met4

```
              72                               116
SS          CCCCCCCCCCCCCCCCCCHHHHHHHHHHHHCCCCCCCC---CC--CC--HHHC-----
S_cerevisiae RRPLIGDVTNRGNTNLYDHAVTPEILLEQLAYVDNFIPSLDNE---F--SNVD--WVNTTTHNN---
S_paradoxus RRPLVGDVSSRGNTNLYDHAVTPEILLEQLAYVDNFIPSLDNE---F--SNVD--WVNTTTHNN---
S_mikatae    RRPLVGDVTRGHTNLYDHAVTPEILLEQLAYVDNFIPSLDNE---F--SNVD--WVNTTTHNN---
S_kudriavzevii RRPLVGDAARGSSANLYDHAVTPEILLEQLAYVDNFIPSLDNE---F--SNVD--WVNTTTHND---
S_bayanus    AQPLLGDVVGARSSNLYDHAVTPEILLEQLAYVDNFIPSLDNE---F--SNVD--WVNTTTHNN---
N_castellii  ---NNHISNSNPDITLDDGTPHILLEQLAYVDNFIPSLDTQPAHTNPGDDPNFDSWFMNNTSNSNS
K_glabrata   ---DSDAHAREEDATPSILLEQLAYVDNFIPSLDHD---FAA--DSWVMDYNGA---
K_africana   ---FLQDTHDATHLPNILLEQLAYVDNFIPSLDQD---FVNLDWSVLNESTSSA---
N_dairensis  ---NNTTNISNTDGFDSNITPSILLEQLAYVDNIFSLDQD---FGNLDWSILGESNNTNSH
V_polyspora  NNSSTGT--TTANTSHNINS EITPSILLEQLAYVDNFINSLEQD---FVNIDSLATLQDFDTTANA
Z_rouxii     -BPM--QMFEQSSGQNNSNITPSILLEQLAYVDNFMPLEQD---FANLDSWILQDPPGSDSTAM
S_kluyveri   -QDSSNLHNDPNITPSILLEQLAYVDNFMPLEND---FTSFDSVMGTGAVNNSAN
K_lactis     ---NHLHSLINPPADVNDVTPSILLEQLAFVDNFITDFNSD---FGPN---VTNSFYNNEGPH
              * * :*****:***: :. : :
              126                               160
SS          ---CCCC--CCCC-----CCCCCCCCCHHHHHHHHHHHHCCCCCCCCCCCCCCCC---
S_cerevisiae ---ANNN--GADT-----FSSINANPFDLDEQLAIELSAFADDSFIFPDEDKPSNNTNNN---
S_paradoxus  ---ANNN--GTDA-----FSSINANPFDLDEQLAIELSAFADDSFIFPDEDKPSNNTNNNNNN---
S_mikatae    ---ISNN--GTNT-----FSSINANPFDLDEQLAIELSAFADDSFIFPDEDKPNNTNNNTND---
S_kudriavzevii ---INNN--GANT-----FSSINANPFDLDEQLAIELSAFADDSFIFPDEEKPGNSNNTN---
S_bayanus    ---INNN--GTNT-----FNTINANPFDLDEQLAIELSAFADDSFIFPDEDKPNNTNNNNNS---
N_castellii  S--TSNS--SPNT-----IINSSNSYSQSINSDERLALELNAFAAETFIFPDEDKPNNGNPNDFQM
K_glabrata   ---AGGS--GVD-----GAMSVADMGLDEQLS AELSVFAADDAFIFPDEDKSNNTNNNSGDD
K_africana   ---NLLNFG LDEQLAELSAFADDSFIFPDEDKAQNHDDGNDD
N_dairensis  PNQLNNNNNNNTNNDIIGSFSSNTMIMNMNSFGLDEQLAELSAFADDESIFPDEDKPPRNDDDDAND
V_polyspora  T--LTST--SANDNNHINMNTINNTNELESNIGWGFDERLARELSAFADDSFVFHDEEKPKKVDSDDDR
Z_rouxii     A--LGGN--SSSN-----GQRLNESGLGFDERLAAELSAFADDSFIFPDEDKRQRQISGAVS
S_kluyveri   ---NHGGHGGVGLDERLAAELSAFADDESIFPDEEKPSHNDNDGSDN
K_lactis     G-----DVTNFSG MPLNHQVGGLSADNQLAMDERLAAELSVFADETIFPDEDKADRHSDDNGD
              ** : * : * . * * : : * * * * *
```

## B Ino2

```
              1                               50
SS          -CCCCCCCCCHHHhCC--CCCCHHHHHHHHHHCCCCCCCCCCCCCCCCCCC---CCCCCCCCCCCC
S_cerevisiae --MQQATGNELLGILDL--NDIDFETAYQMLSSNFDDQMSAHIHENTFSAATSP--PLLTHELGIIPNVAT
S_paradoxus  --MQQATGNELLGILDL--NDIDFETAYQMLSSNFDDQMSAHIHENTFSTGSP--PLLTHDLGVIPNVT
S_arboricola --MQQATGNELLGILDL--NDIDFETAYQMLSGNFDDQLPAHMHEMTFGTASP--PLLTNELGVIPNMT
S_bayanus    --MQQATGNELLGILDL--NDIDFETAYQMLSSNFDDQLPAHMHESTFSAAS--PLLAHELGVIPSVAT
S_kudriavzevii --MQQATGNELLGILDL--NDIDFETAYQMLSSNFDDQMPAHIHEGTFAST--PLLTHELGVVNPVAT
K_africana   --MNHDSNIDLDMFDLN--TEIDFETAYQMLS--NIENASPNYDDKH--LNFVSTRSHLHN---DMSNMF
Z_rouxii     MESVGGGGDMFDLFDLNDNDIDFETAYKMIS--NFDDVASSGHEHDELLPRLGF--GDLT---VET--QFG
Z_baillii    --MDAVGGGDMFDLFDLNDNDIDFETAYKMIS--NFDDATSS--LNDDMLPKLGF--GNMEK---VNAQQA
              :: : : * * : : * * * * * : * * * * :
              96
SS          CCCCCCCCCCCC---CCC-----CCCCCCCCCCCCCCCCCC---
S_cerevisiae VQPSHVETIPADNQ-----THH-----APLHTHAHYLNHNHPQPS-----
S_paradoxus  VQPSHVEALPIDNQ-----THH-----VPLNSHAHYLNHNHPQPS-----
S_arboricola VQPSHMEALPIEHQ-----IHH-----PPPNSHSHYVDQNPFRSN-----
S_bayanus    VQPSHVEALPINPQ-----IHH-----HPPNPHTGYLNHTPQQAS-----
S_kudriavzevii VQPSHMEALPIDHQ-----IHH-----ATVNSQVHYLNHNPNQTT-----
K_africana   YPHGHLQGHQFQEQEQHHQDSQLVHQRNG--HYYNHRHQHGHDYHNKHQLPLQHDLT---SMHSTA
Z_rouxii     LN--NRREDQDEQQHHQQEQWSLQPHHQWPLQLHPQPSHAQQLQNYQDFPLKQKQQQSDSLERNA
Z_baillii    LN--QTDQH--ELPDQRQHQEWHHNE-----PLEGVLK-----SIQT---
              :
              142                               150                               160
SS          ---CCCCCCCCCCCCCChhhHHHHHHHHHHHHHHHHHCCCCCCCCCCCCCCCC---EECCCCC
S_cerevisiae ---MGFDQALGLKLPSSSGLLSTNESNAIEQFLDNLISQDMMSSNASMNSHSHL---HIRSPKKQ
S_paradoxus  ---VGFHTLGLKLPSSNSGLLSTNESNAIEQFLDNLISQDMMSSNASMGPDHL---HTRSPKKQ
S_arboricola ---VSFHTLSSKLPSSSGLLSTNESNAIEQFLDNLISQDMMSSATSMSPDVHL---HLKSPKKQ
S_bayanus    ---MGFDHALGSKLPSSSGLLSTNESNAIEQFLDNLISQDMMSSGTSPVSDANL---HTKSPKKQ
S_kudriavzevii ---IGFEHTLGPLKLPSSSGLLSTNESNAIEQFLDNLISQDMMSSSTTISPDHML---HAKSPKKQ
K_africana   ---YANGIAGDELLSTFETNAIEHFLDTLITNDKLDKQNSNSDSLNTSTFVTDVTRSPKKR
Z_rouxii     ETVNGGEFAQHETGTRDDRQQLLSAYESNAIEHFLDSLISHNHAREKEE---
Z_baillii    ---DHSTCANEPDRNPQLLSVYESNAIEQFLDSLVRNNVTEWDE---
              * * * : * : * * * : * * : : : *
```

## Figure 4

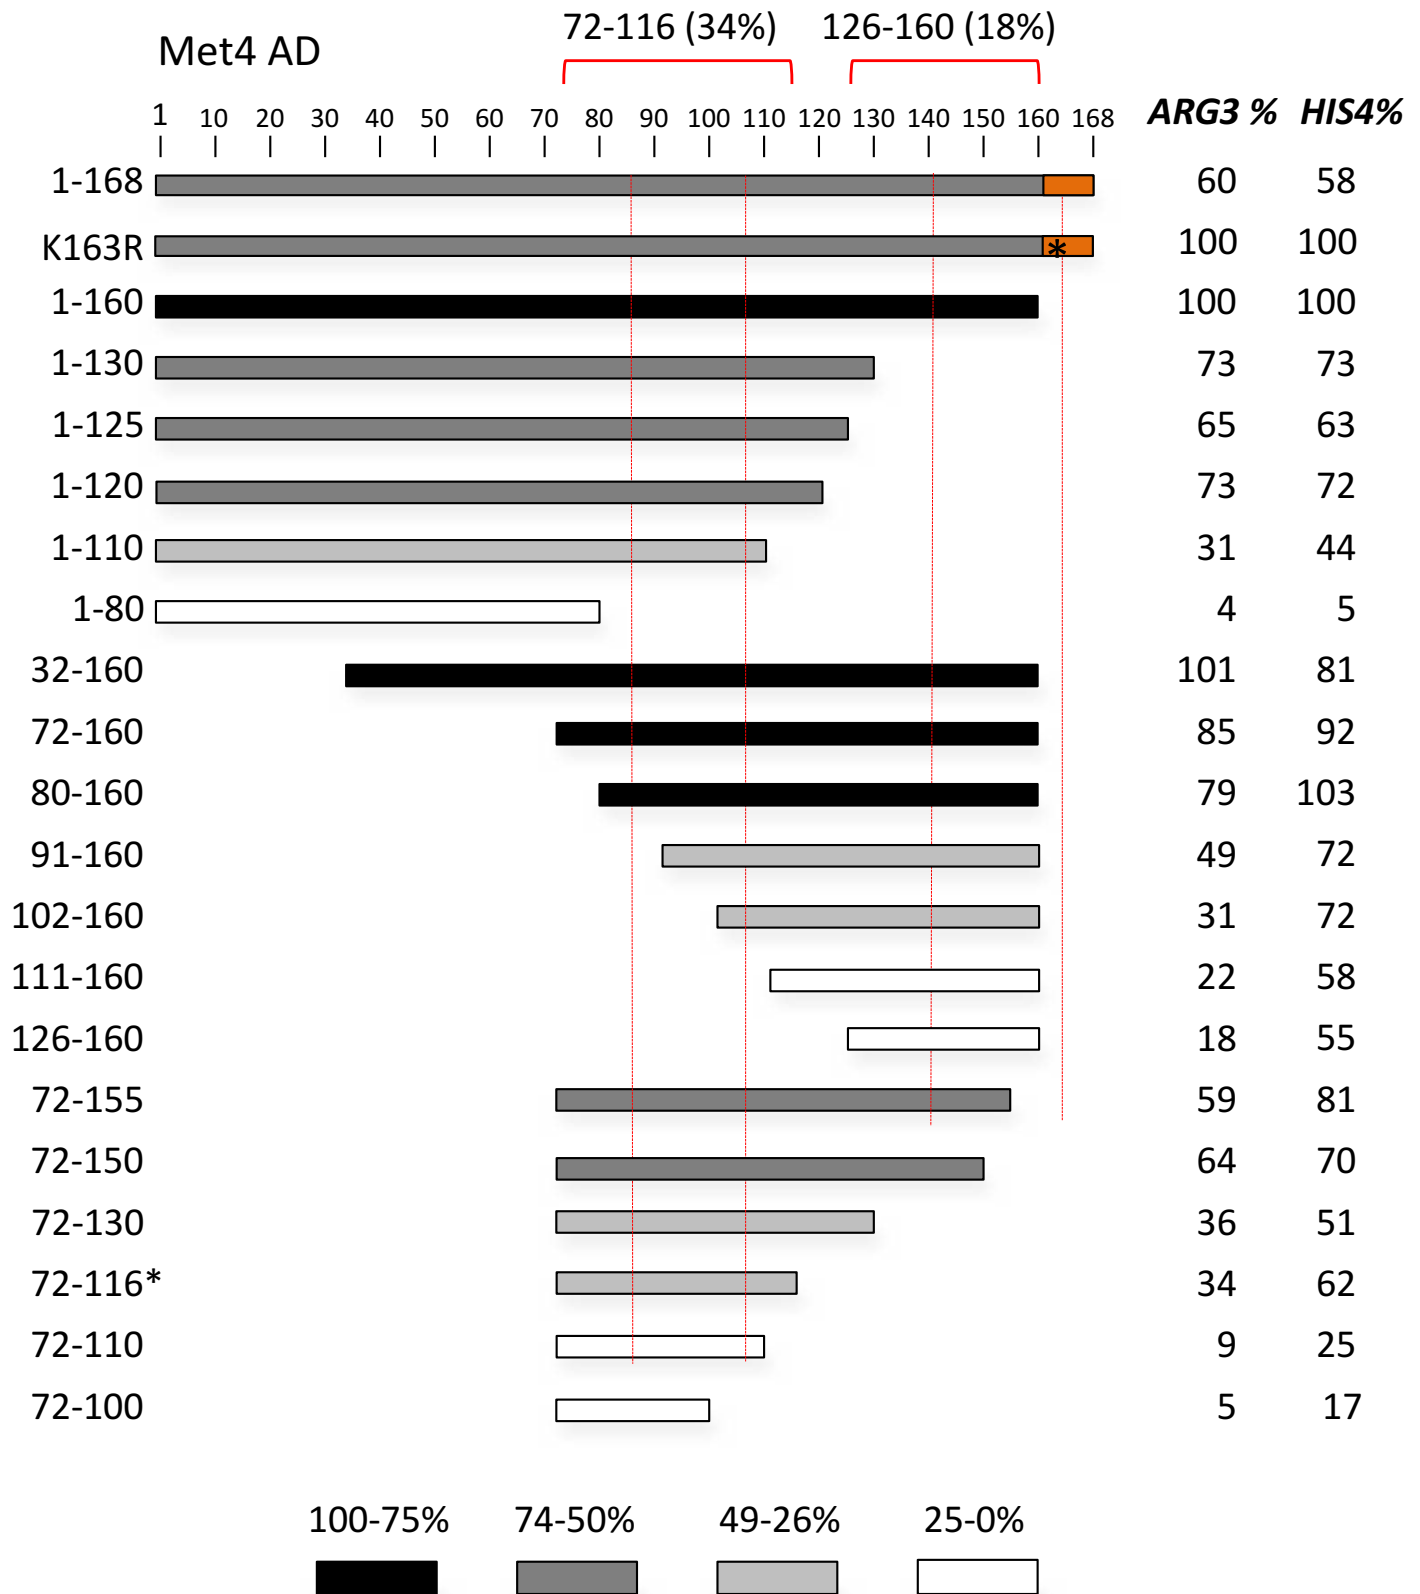

## Figure 5

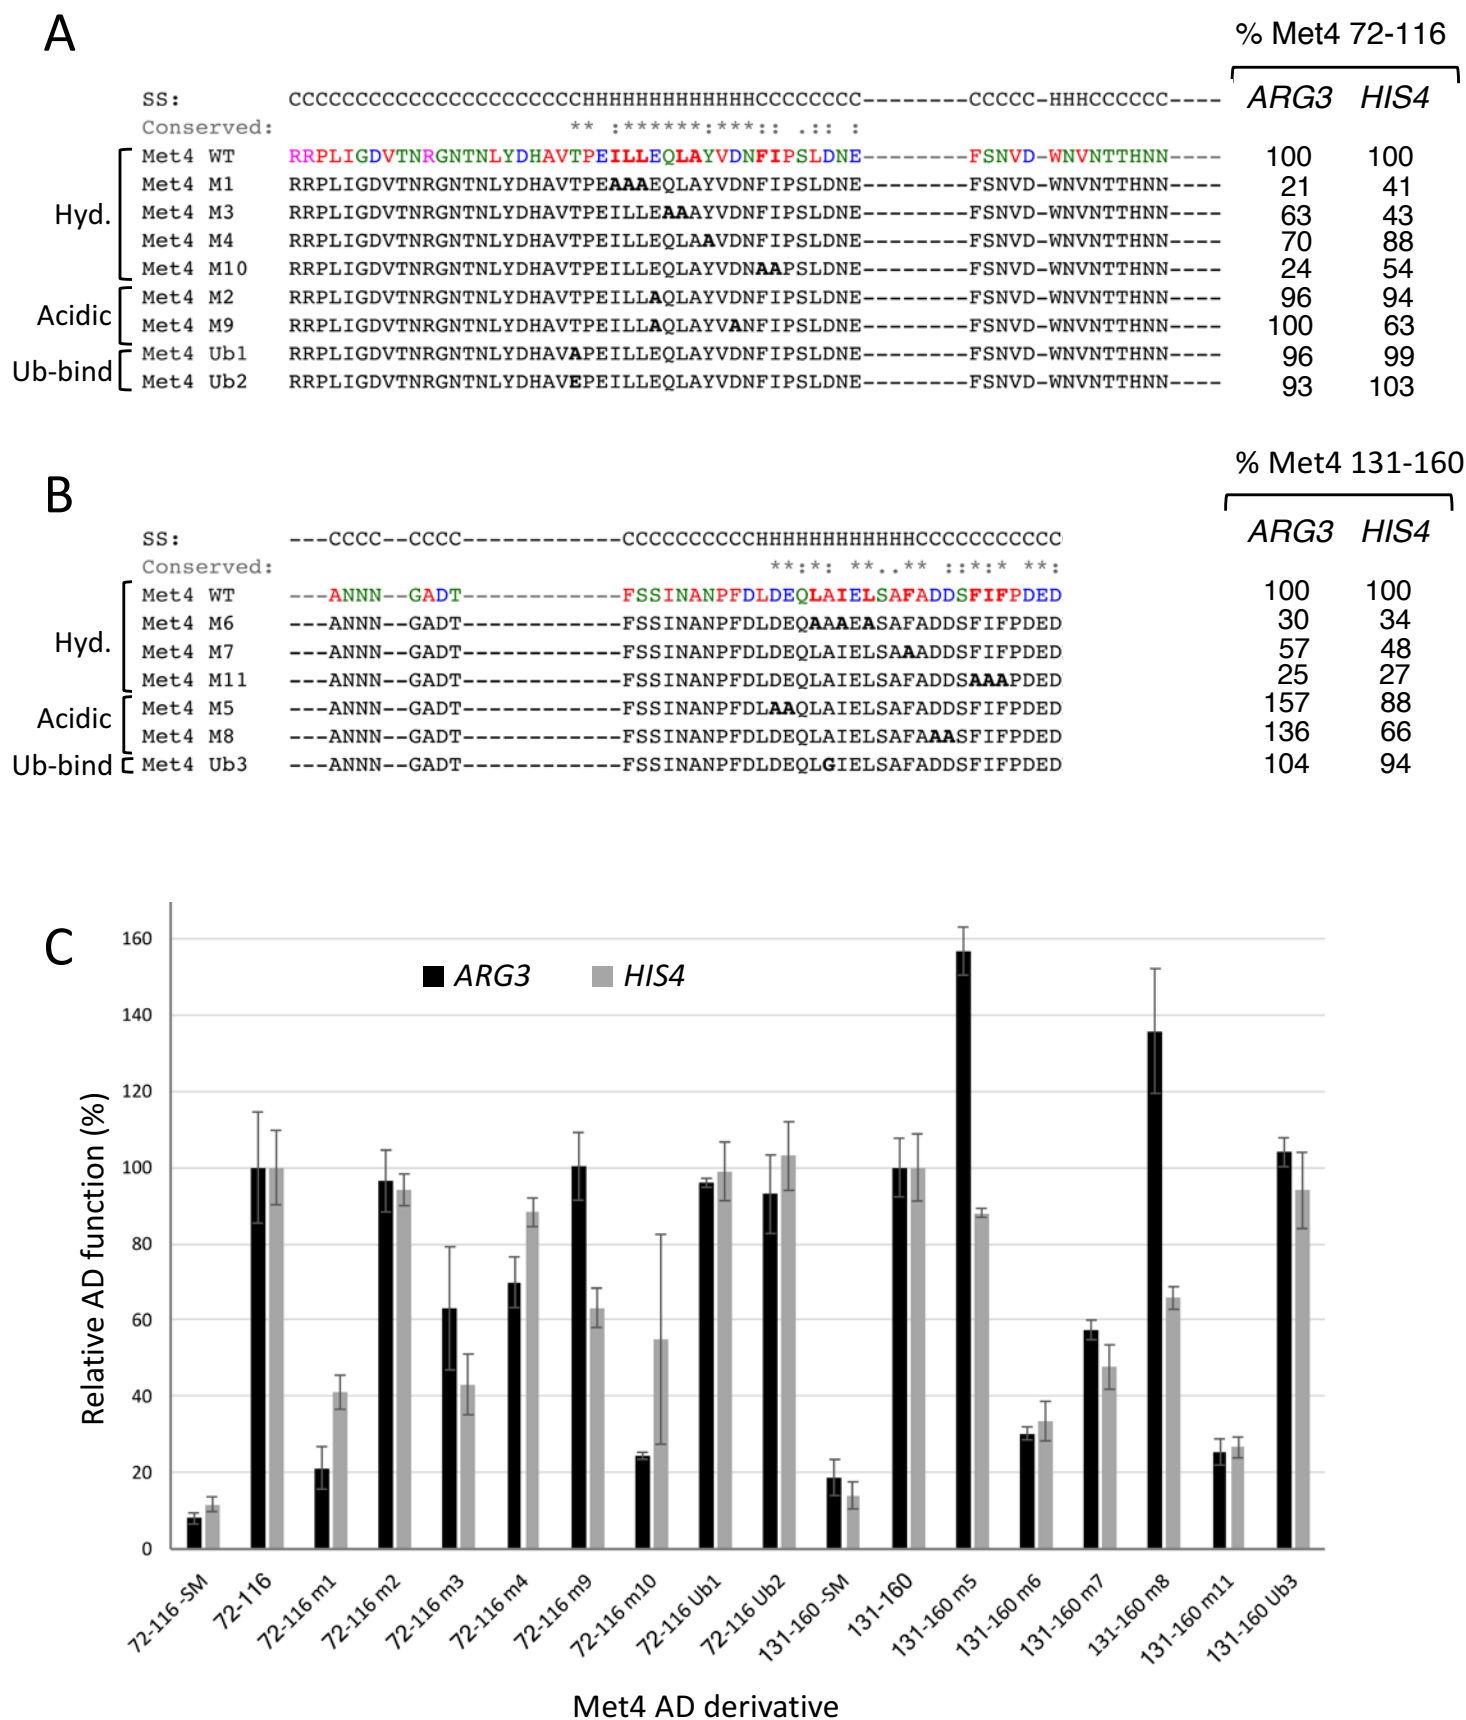



## Figure 6

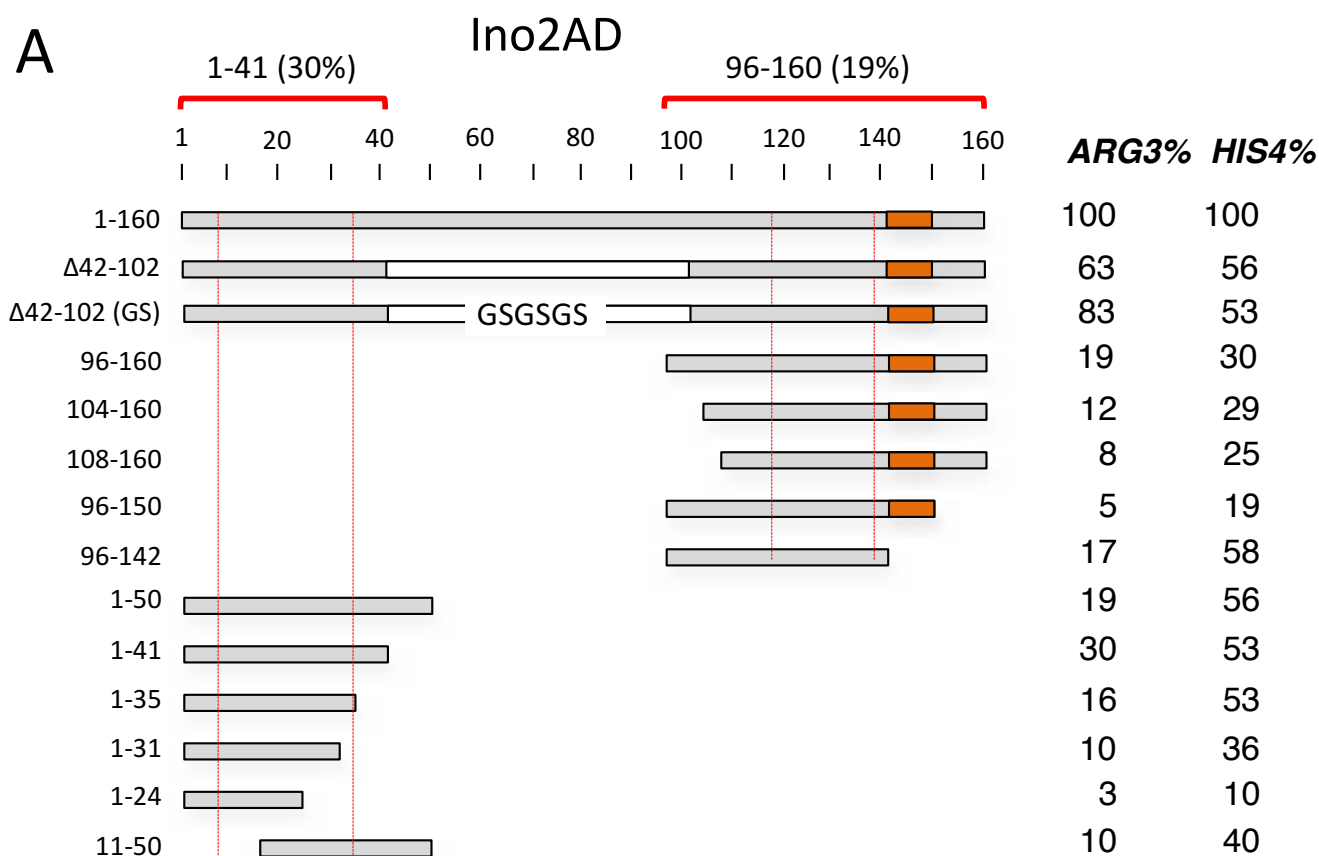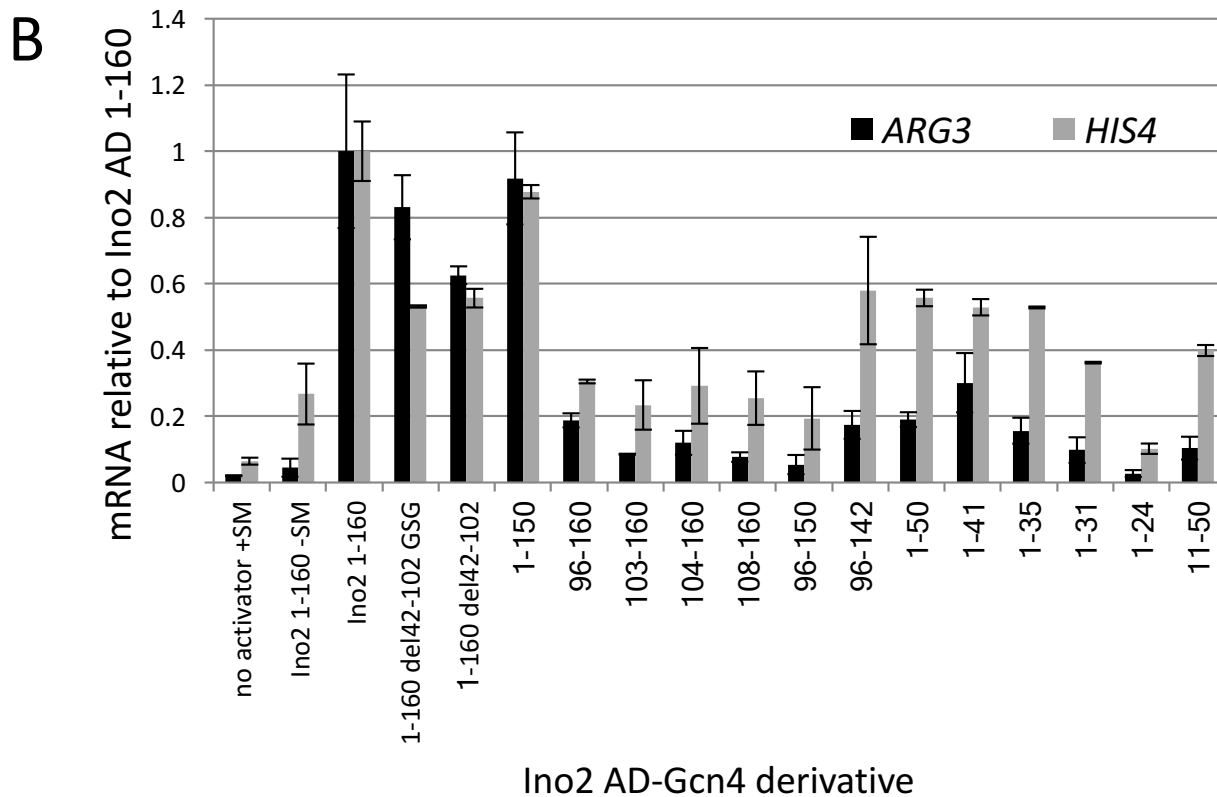

## Figure 7

### A

### Ino2 ADs

|                  |            | SS: CCCCCCCCCHHHhCC--CCCCHHHHHHHHHhCCCCCCCCCCCCCCCC                                                                                                        | ARG3%                                                             | HIS3% |  |
|------------------|------------|------------------------------------------------------------------------------------------------------------------------------------------------------------|-------------------------------------------------------------------|-------|--|
| <b>Mutations</b> |            | Conserved: :: :*: : :*****:* * : : . . :                                                                                                                   |                                                                   |       |  |
| WT 1-50          |            | MQQATGNE <b>L</b> L <b>G</b> ILDL--NDIDFETAYQ <b>L</b> SSNFDDQ <b>S</b> AH <b>I</b> HENTFSATSP                                                             | 100                                                               | 100   |  |
| Hydrophobic      | 1-50 M1    | MQQATGNE <b>AA</b> GILDL--NDIDFETAYQ <b>L</b> SSNFDDQ <b>S</b> AH <b>I</b> HENTFSATSP                                                                      | 44                                                                | 62    |  |
|                  | 1-50 M2    | MQQATGNE <b>L</b> L <b>AA</b> D--NDIDFETAYQ <b>L</b> SSNFDDQ <b>S</b> AH <b>I</b> HENTFSATSP                                                               | 22                                                                | 33    |  |
|                  | 1-50 M3    | MQQATGNE <b>L</b> L <b>AD</b> --ND <b>AD</b> ETAYQ <b>L</b> SSNFDDQ <b>S</b> AH <b>I</b> HENTFSATSP                                                        | 22                                                                | 34    |  |
|                  | 1-50 M4    | MQQATGNE <b>L</b> L <b>AA</b> SSNFDDQ <b>S</b> AH <b>I</b> HENTFSATSP                                                                                      | 13                                                                | 18    |  |
| Acidic           | 1-50 M5    | MQQATGNE <b>L</b> L <b>AD</b> --NDIDFETAYQ <b>L</b> SSNFDDQ <b>AS</b> AH <b>I</b> HENTFSATSP                                                               | 52                                                                | 62    |  |
|                  | 1-50 M6    | MQQATGNE <b>L</b> L <b>ALA</b> --NDIDFETAYQ <b>L</b> SSNFDDQ <b>S</b> AH <b>I</b> HENTFSATSP                                                               | 45                                                                | 46    |  |
|                  | 1-50 M7    | MQQATGNE <b>L</b> L <b>AL</b> -- <b>NA</b> IFATAYQ <b>L</b> SSNFDDQ <b>S</b> AH <b>I</b> HENTFSATSP                                                        | 21                                                                | 30    |  |
| Polar            | 1-50 M20   | MQQAT <b>AA</b> ELGILDL--NDIDFETAYQ <b>L</b> SSNFDDQ <b>S</b> AH <b>I</b> HENTFSATSP                                                                       | 137                                                               | 108   |  |
|                  | 1-50 M21   | MQQATGNE <b>L</b> L <b>AA</b> NFDDQ <b>S</b> AH <b>I</b> HENTFSATSP                                                                                        | 110                                                               | 97    |  |
|                  | 1-50 M22   | MQQATGNE <b>L</b> L <b>AAA</b> IHENTFSATSP                                                                                                                 | 165                                                               | 112   |  |
|                  |            |                                                                                                                                                            | SS: CCCCCCCCCCCCCCCCCChhhhhHHHHHHHHHHHHHHhCCCCCCCCCCCCCCCCCECCCCC |       |  |
|                  |            |                                                                                                                                                            | Conserved: **** * :*****:* * : : . . :                            |       |  |
| 96-160           |            | PHQPSMGFDQ <b>L</b> L <b>L</b> SPSSS <b>L</b> LSTNES <b>NA</b> IEQFLDN <b>L</b> ISQDMMSS <b>NA</b> SMN <b>SE</b> SHLH <b>IR</b> SP <b>KK</b> Q             | 100                                                               | 100   |  |
| Hydrophobic      | 96-160 M8  | PHQPS <b>AG</b> ADQALG <b>L</b> L <b>L</b> SPSSS <b>L</b> LSTNES <b>NA</b> IEQFLDN <b>L</b> ISQDMMSS <b>NA</b> SMN <b>SE</b> SHLH <b>IR</b> SP <b>KK</b> Q | 26                                                                | 50    |  |
|                  | 96-160 M9  | PHQPSMGFDQ <b>AA</b> AK <b>A</b> SPSSS <b>L</b> LSTNES <b>NA</b> IEQFLDN <b>L</b> ISQDMMSS <b>NA</b> SMN <b>SE</b> SHLH <b>IR</b> SP <b>KK</b> Q           | 29                                                                | 62    |  |
|                  | 96-160 M10 | PHQPSMGFDQALG <b>L</b> L <b>L</b> SPSSS <b>GA</b> ASTNES <b>NA</b> IEQFLDN <b>L</b> ISQDMMSS <b>NA</b> SMN <b>SE</b> SHLH <b>IR</b> SP <b>KK</b> Q         | 32                                                                | 64    |  |
|                  | 96-160 M12 | PHQPSMGFDQALG <b>L</b> L <b>L</b> SPSSS <b>L</b> LSTNES <b>NA</b> IEQFLDN <b>AA</b> SQDMMSS <b>NA</b> SMN <b>SE</b> SHLH <b>IR</b> SP <b>KK</b> Q          | 11                                                                | 18    |  |
| Acidic           | 96-160 M13 | PHQPSMGFDQALG <b>L</b> L <b>L</b> SPSSS <b>L</b> LSTNES <b>NA</b> IEQFLDN <b>L</b> ISQD <b>AA</b> SS <b>NA</b> SMN <b>SE</b> SHLH <b>IR</b> SP <b>KK</b> Q | 24                                                                | 58    |  |
|                  | 96-160 M14 | PHQPSMGFDQALG <b>L</b> L <b>L</b> SPSSS <b>L</b> LST <b>NA</b> IA <b>Q</b> FL <b>AN</b> LISQDMMSS <b>NA</b> SMN <b>SE</b> SHLH <b>IR</b> SP <b>KK</b> Q    | 9                                                                 | 15    |  |
|                  | 96-160 M15 | PHQPSMGFDQALG <b>L</b> L <b>L</b> SPSSS <b>L</b> LSTNES <b>NA</b> IEQFLDN <b>L</b> ISQDMMSS <b>NA</b> SMN <b>SE</b> SHLH <b>IR</b> SP <b>KK</b> Q          | 84                                                                | 99    |  |
| Polar            | 96-160 M16 | PHQPSMGFDQALG <b>L</b> L <b>L</b> SP <b>AA</b> S <b>L</b> LSTNES <b>NA</b> IEQFLDN <b>L</b> ISQDMMSS <b>NA</b> SMN <b>SE</b> SHLH <b>IR</b> SP <b>KK</b> Q | 78                                                                | 100   |  |
|                  | 96-160 M17 | PHQPSMGFDQALG <b>L</b> L <b>L</b> SPSSS <b>L</b> L <b>AA</b> NES <b>NA</b> IEQFLDN <b>L</b> ISQDMMSS <b>NA</b> SMN <b>SE</b> SHLH <b>IR</b> SP <b>KK</b> Q | 14                                                                | 25    |  |
|                  | 96-160 M18 | PHQPSMGFDQALG <b>L</b> L <b>L</b> SPSSS <b>L</b> LSTNES <b>NA</b> IEQFLDN <b>L</b> ISQDMMSS <b>NA</b> SMN <b>SE</b> SHLH <b>IR</b> SP <b>KK</b> Q          | 103                                                               | 107   |  |
|                  | 96-160 M19 | PHQPSMGFDQALG <b>L</b> L <b>L</b> SPSSS <b>L</b> LSTNES <b>NA</b> IEQFLDN <b>L</b> ISQDMMSS <b>NA</b> SMN <b>SE</b> SHLH <b>IR</b> SP <b>KK</b> Q          | 99                                                                | 100   |  |

### B

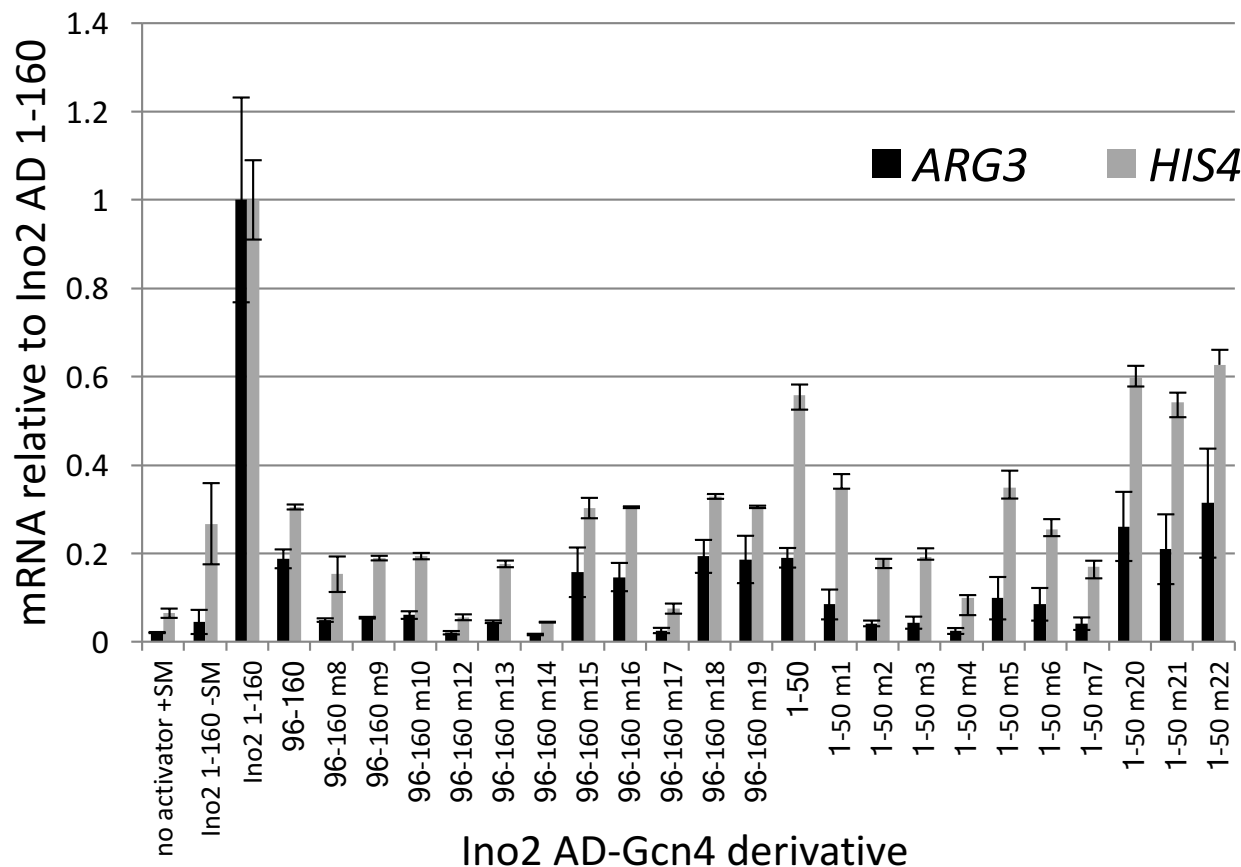

## Figure 8

### Met4 AD-Med15

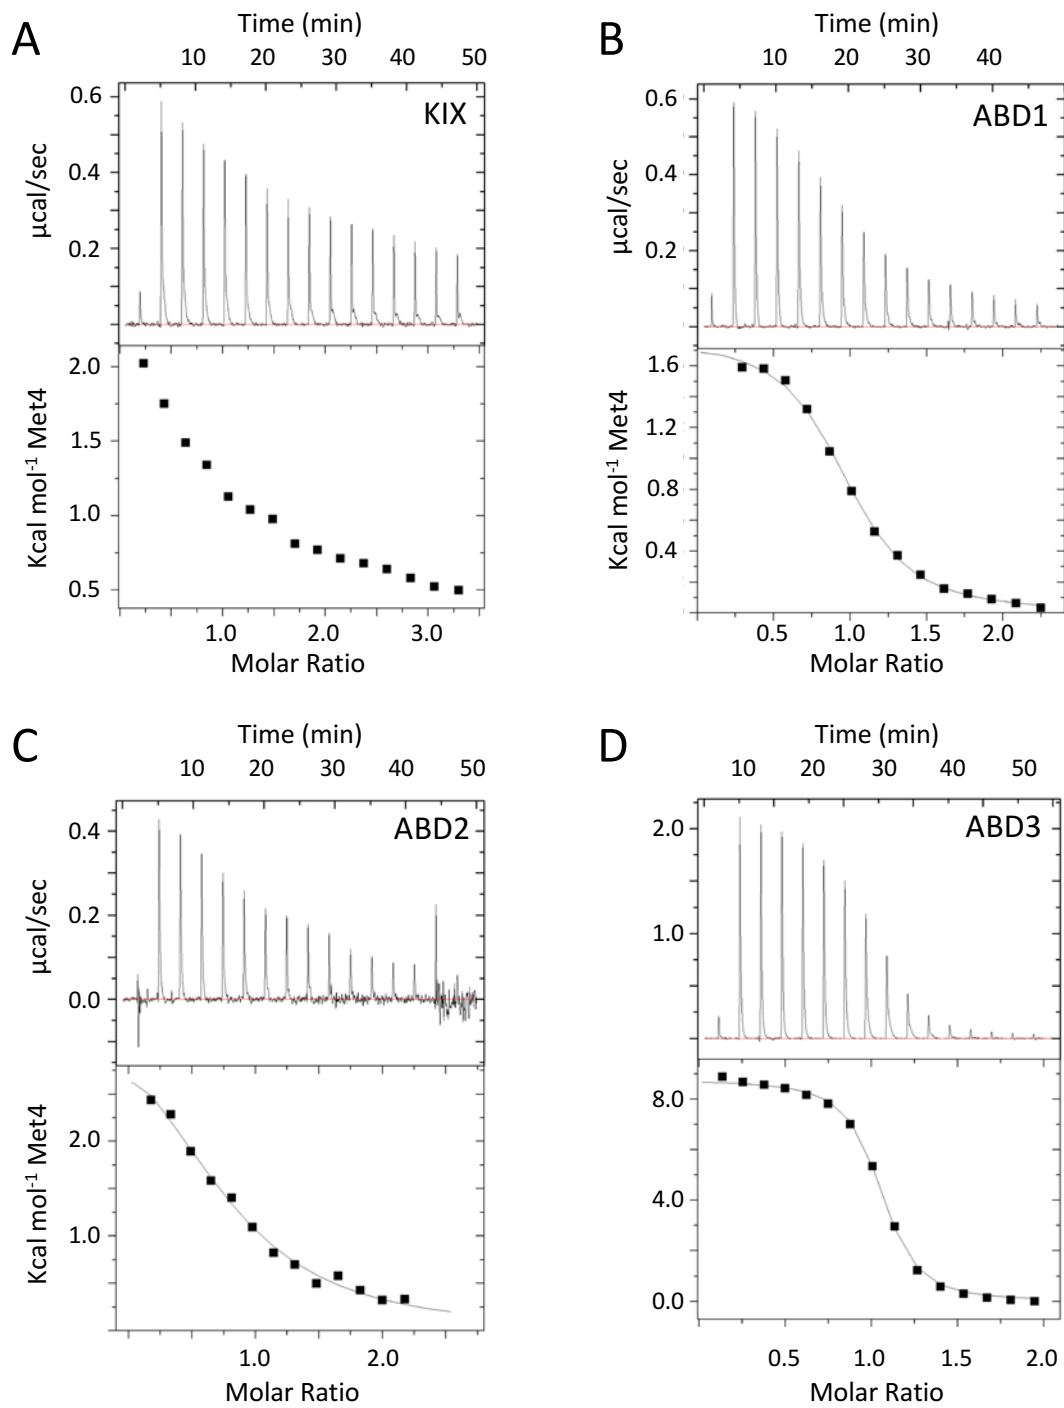

Figure 9

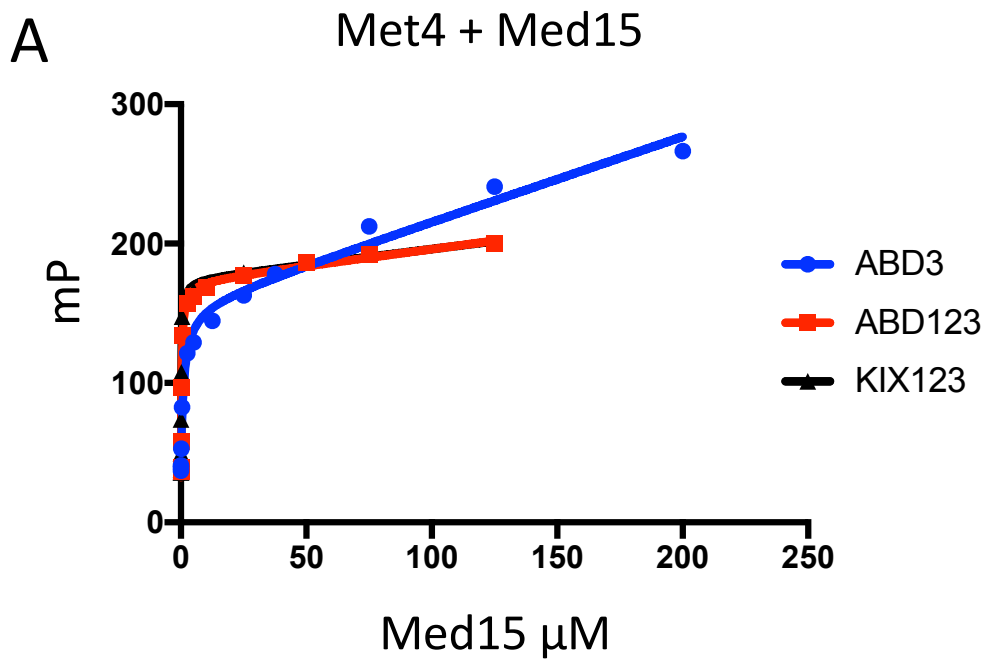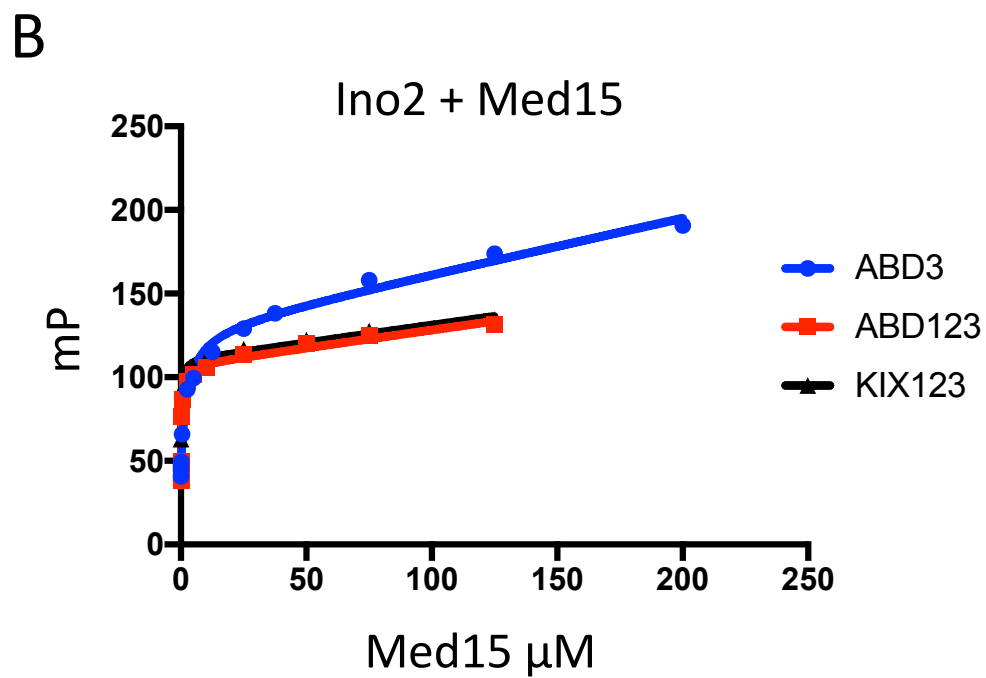

# Figure 10

## Ino2 AD-Med15

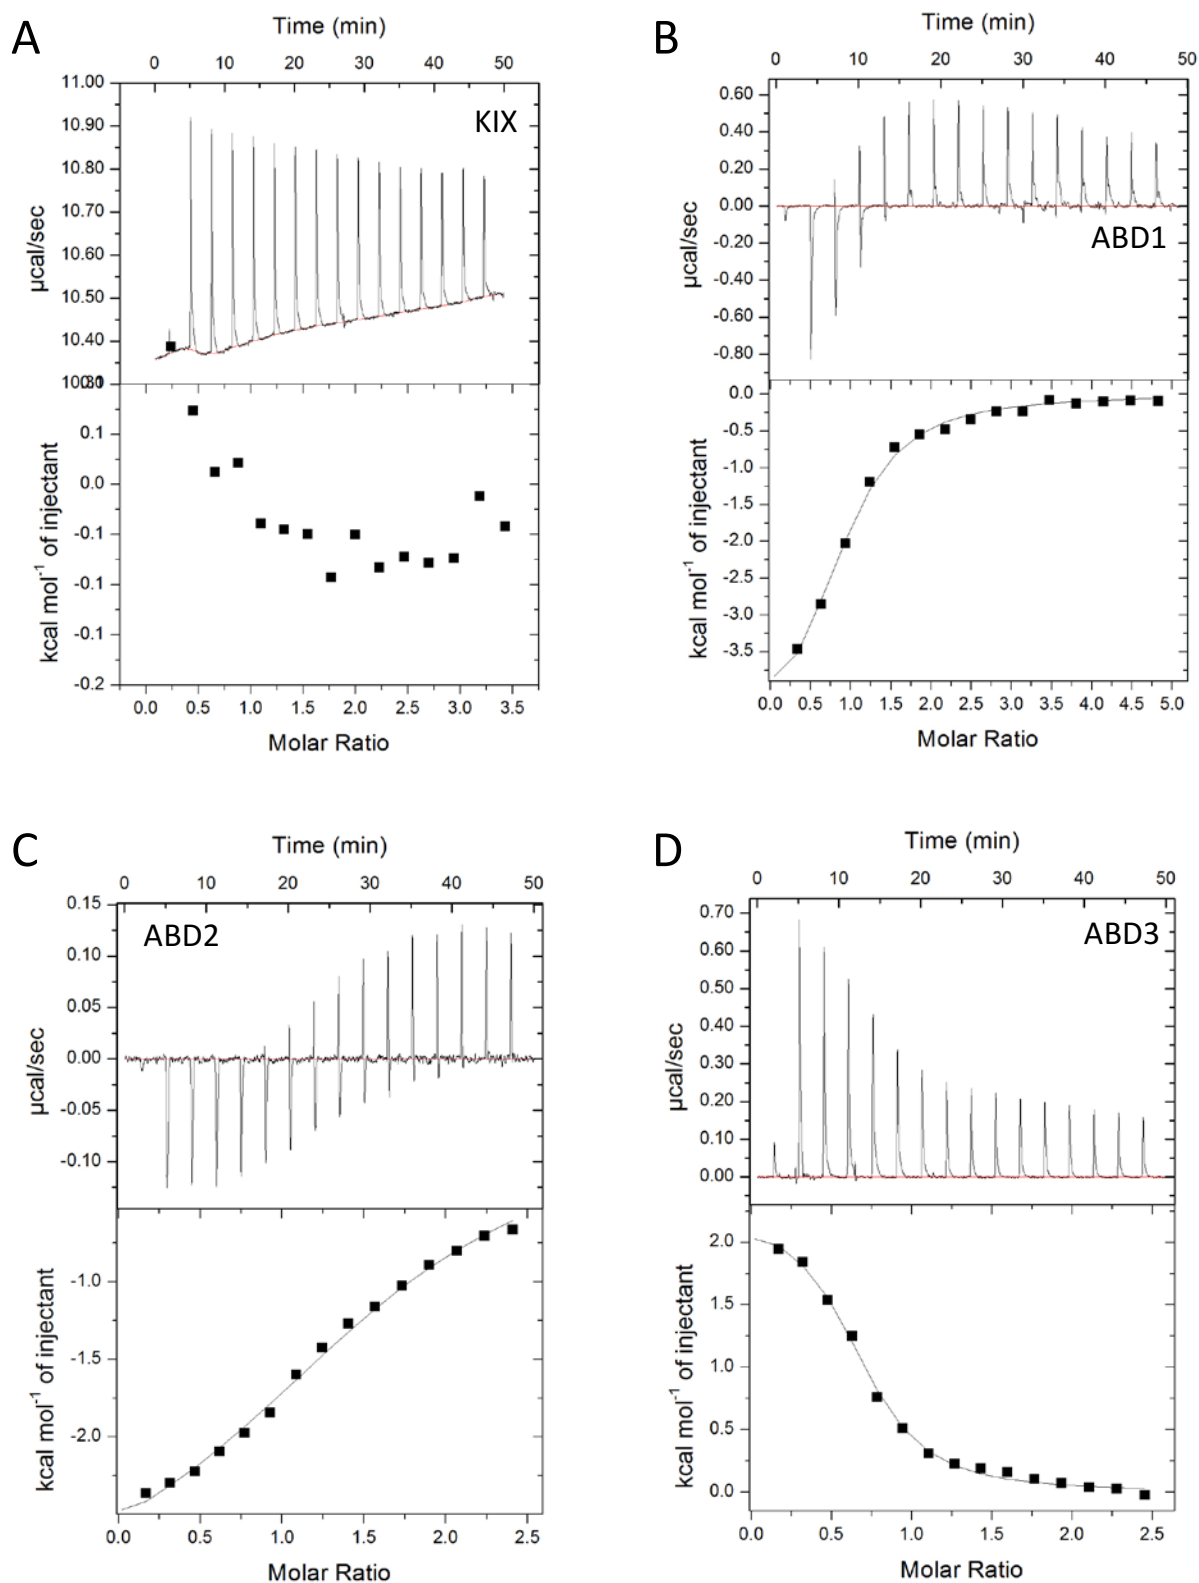

## Figure 11

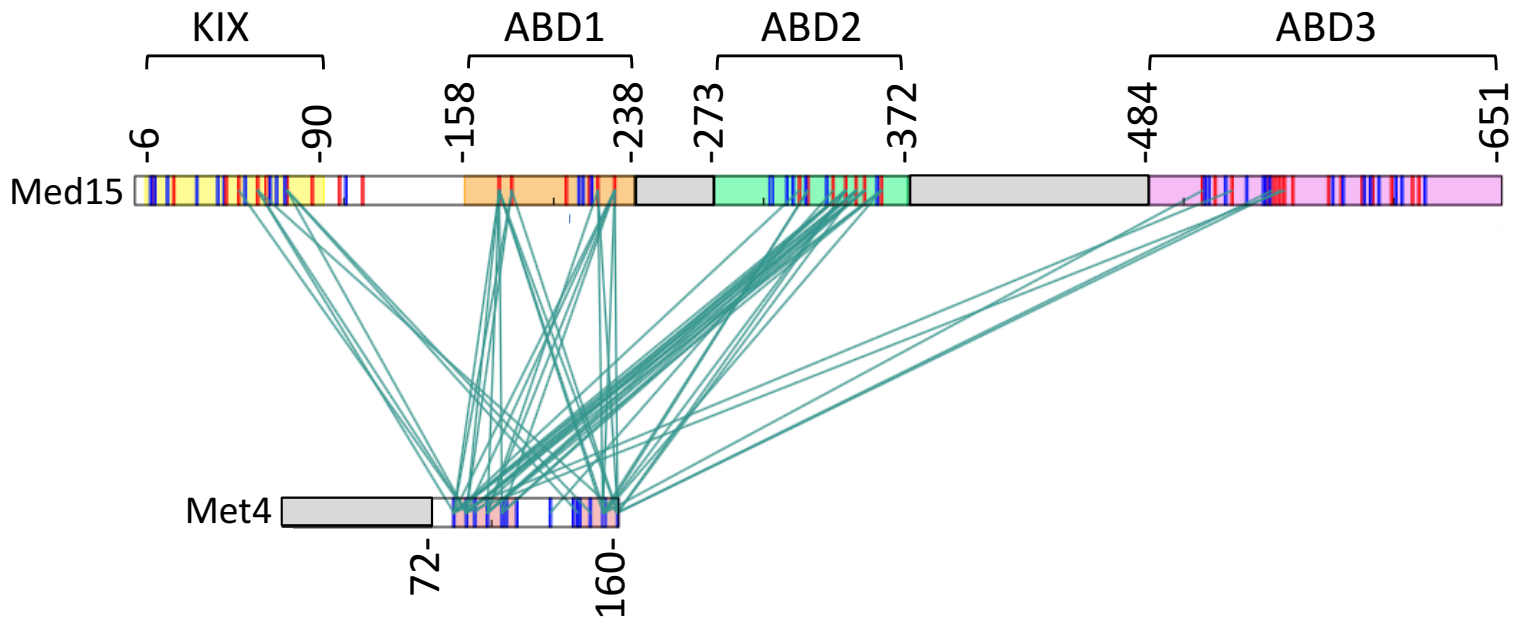

Source: https://www.biorxiv.org/content/10.1101/228536v1.full.pdf
